# Supplementary material
Source: PubMed Central journal article supplement (PMC4154056)
Supplement: NIHMS619807-supplement-01.pdf [file NIHMS619807-supplement-01.pdf]

Table S1 Correlation of the number of nonaggregate haplotypes by nucleotide substitutions per 100 single cells with age

| Samples                                                                                                            | r    | r <sup>2</sup> | P-value |
|--------------------------------------------------------------------------------------------------------------------|------|----------------|---------|
| All 51 samples from 49 subjects                                                                                    | 0.44 | 0.19           | 0.001   |
| All samples excluding the three cord blood samples and one adolescent sample                                       | 0.41 | 0.17           | 0.004   |
| All samples (controlling for family) <sup>1</sup>                                                                  | 0.40 | —              | 0.004   |
| All samples excluding the three cord blood samples and one adolescent sample (controlling for family) <sup>1</sup> | 0.40 | —              | 0.007   |
| Family A only                                                                                                      | 0.89 | 0.79           | 0.018   |
| Family B only                                                                                                      | 0.19 | 0.04           | 0.485   |
| Family C only                                                                                                      | 0.87 | 0.76           | 0.128   |

<sup>1</sup> “Family” as a control variable for all subjects

Table S2 Correlation of the number of haplotypes per 100 single cells with age

| Samples                                                                                                            | r    | r <sup>2</sup> | P-value |
|--------------------------------------------------------------------------------------------------------------------|------|----------------|---------|
| All 51 samples from 49 subjects                                                                                    | 0.44 | 0.20           | 0.001   |
| All samples excluding the three cord blood samples and one adolescent sample                                       | 0.42 | 0.17           | 0.003   |
| All samples (controlling for family) <sup>1</sup>                                                                  | 0.40 | —              | 0.005   |
| All samples excluding the three cord blood samples and one adolescent sample (controlling for family) <sup>1</sup> | 0.40 | —              | 0.006   |
| Family A only                                                                                                      | 0.88 | 0.77           | 0.022   |
| Family B only                                                                                                      | 0.16 | 0.03           | 0.554   |
| Family C only                                                                                                      | 0.87 | 0.75           | 0.135   |

<sup>1</sup> “Family” as a control variable for all subjects

**Table S3.** Aggregate mtDNA sequence in single CD34<sup>+</sup> cells from members in the four families and three cord blood samples

| Family / Donor | Sequence variation                                                              | Haplogroup |
|----------------|---------------------------------------------------------------------------------|------------|
| Family A       | 16168-16192-16256-16266-16294-16526-73-263-455delT-(523-524)insAC               | U5a        |
| Family B       | 16150-16189-16311-152-195-263-270                                               | H11        |
| Family C / C01 | 16192-16256-16270-16311-16399-73-199-263                                        | U5a1       |
| Family C / C02 | 16145-16176A-16223-16390-16519-73-152-263                                       | N1b        |
| Family C / C03 | 16126-16294-16296-16304-16519-73-263                                            | T2b        |
| Family D       | 16192-16256-16270-16362-16399-16428-73-249-263                                  | U5a1       |
| CB-1           | 16129-16223-16391-16519-73-152-199-204-207-250-263-573+CCC                      | I2'3       |
| CB-2           | 16111-16223-16290-16319-16360-16362-97-(106-111)del-146-153-235-263             | A2         |
| CB-3           | 16092-16172-16182C-16183C-16189-16223-16266-16362-73-150-263-489-(523-524)delAC | D5a2a      |

Note: These maternally related members in each family had same aggregate sequence. Family C has three matriline, as represented by C-1, C-2, and C-3, respectively. Sequence variation was scored according to the consensus sequence of the single CD34<sup>+</sup> cells. Positions were numbered according to the revised Cambridge Reference Sequence (CRS) [1]. Suffixes C and G indicate transversions and “ins” indicates insertions. Insertions were recorded at the last possible site. The length mutations of the C-tract in regions 16184-16193 and 303-309 were not included. All samples had 315insC in the second hypervariable segment of mtDNA control region. Each mtDNA was assigned to respective haplogroup based on the classification system of world mtDNA phylogeny [2].

**Supplementary references:**

- [1] Andrews RM, Kubacka I, Chinnery PF, et al. Reanalysis and revision of the Cambridge reference sequence for human mitochondrial DNA. *Nat Genet* 1999;23:147.
- [2] van Oven M, Kayser M. Updated comprehensive phylogenetic tree of global human mitochondrial DNA variation. *Hum Mutat* 2009;30:E386-394

Table S4. mtDNA sequence variation in single CD34<sup>+</sup> cells from healthy donors in four families

| Sample          | Mutation                                     | No. | Haplotype | Haplotype defined by substitutions |
|-----------------|----------------------------------------------|-----|-----------|------------------------------------|
| <b>Family A</b> |                                              |     |           |                                    |
| A-1             | Aggregate sequence                           | 39  | 1         |                                    |
|                 | 16076C>Y, 16174C>Y                           | 1   | 2         | 1                                  |
|                 | 16079C>Y, 523-524insAC/non-ins               | 1   | 3         | 2                                  |
|                 | 16129G>A, 16310G>R                           | 1   | 4         | 3                                  |
|                 | 16129G>R                                     | 1   | 5         | 4                                  |
|                 | 16167C>Y, 16392T>Y, 371C>Y                   | 1   | 6         | 5                                  |
|                 | 16185C>Y, 7C                                 | 1   | 7         | 6                                  |
|                 | 16192C>Y, 8C/9C                              | 1   | 8         | 7                                  |
|                 | 16224T>Y                                     | 1   | 9         | 8                                  |
|                 | 16234C>Y, 40T>Y, 523-524insAC/non-ins        | 1   | 10        | 9                                  |
|                 | 16275A>R                                     | 1   | 11        | 10                                 |
|                 | 16283A>R                                     | 1   | 12        | 11                                 |
|                 | 16286C>T                                     | 1   | 13        | 12                                 |
|                 | 16287C>Y, 16336G>R                           | 1   | 14        | 13                                 |
|                 | 16295C>Y, 123A>R                             | 1   | 15        | 14                                 |
|                 | 16299A>R                                     | 1   | 16        | 15                                 |
|                 | 16304T>Y, 78C>Y, 8C/9C, 523-524insAC/non-ins | 1   | 17        | 16                                 |
|                 | 16308T>Y, 16545T>Y, 91C>Y                    | 1   | 18        | 17                                 |
|                 | 16338A>R                                     | 1   | 19        | 18                                 |
|                 | 16381T>Y, 16449C>Y, 523-524ins2AC/insAC      | 1   | 20        | 19                                 |
|                 | 16445T>Y, 436C>Y                             | 1   | 21        | 20                                 |
|                 | 16447C>A                                     | 1   | 22        | 21                                 |
|                 | 16468T>Y, 523-524insAC/non-ins               | 1   | 23        | 22                                 |
|                 | 16476A>R, 17C>Y                              | 1   | 24        | 23                                 |
|                 | 16484T>Y                                     | 1   | 25        | 24                                 |
|                 | 16536C>Y                                     | 1   | 26        | 25                                 |
|                 | 72T>Y                                        | 1   | 27        | 26                                 |
|                 | 127T>Y                                       | 1   | 28        | 27                                 |
|                 | 129T>Y, 8C/9C                                | 1   | 29        | 28                                 |
|                 | 204T>C                                       | 1   | 30        | 29                                 |
|                 | 217T>Y                                       | 1   | 31        | 30                                 |
|                 | 220T>Y                                       | 1   | 32        | 31                                 |
|                 | 233T>Y, 412G>R, 7C/8C                        | 1   | 33        | 32                                 |
|                 | 266T>Y, 8C/9C                                | 1   | 34        | 33                                 |
|                 | 279T>G                                       | 1   | 35        | 34                                 |
|                 | 368A>R                                       | 1   | 36        | 35                                 |
|                 | 391T>C                                       | 1   | 37        | 36                                 |
|                 | 430T>T/A, 437C>Y                             | 1   | 38        | 37                                 |
|                 | 438C>T, 556A>G                               | 1   | 39        | 38                                 |
|                 | 455non-del                                   | 1   | 40        |                                    |
|                 | 460T>Y, 8C/9C                                | 1   | 41        | 39                                 |
|                 | 469C>Y                                       | 1   | 42        | 40                                 |
|                 | 572C>Y, 594C>Y                               | 1   | 43        | 41                                 |
|                 | 579T>Y                                       | 1   | 44        | 42                                 |
|                 | 628C>Y                                       | 1   | 45        | 43                                 |
|                 | 523-524insAC/non-ins                         | 1   | 46        |                                    |
|                 | 523-524non-ins                               | 1   | 47        |                                    |
|                 | 7C                                           | 1   | 48        |                                    |
|                 | 7C/8C                                        | 1   | 49        |                                    |
|                 | 8C/9C                                        | 4   | 50        |                                    |
| A-2             | Aggregate sequence                           | 52  | 1         |                                    |
|                 | 16017T>Y, 16132A>R                           | 1   | 2         | 1                                  |
|                 | 16064T>Y                                     | 1   | 3         | 2                                  |

|                                        |    |    |    |
|----------------------------------------|----|----|----|
| 16075T>Y                               | 1  | 4  | 3  |
| 16121T>Y                               | 1  | 5  | 4  |
| 16153G>R                               | 1  | 6  | 5  |
| 16159C>Y, 99T>Y, 7C/8C                 | 1  | 7  | 6  |
| 16172T>Y                               | 1  | 8  | 7  |
| 16175A>R, 71G>A, 8C/9C                 | 1  | 9  | 8  |
| 16198T>Y, 16234C>Y, 214A>G             | 1  | 10 | 9  |
| 16209T>Y, 141C>Y, 495C>T               | 1  | 11 | 10 |
| 16298T>Y                               | 1  | 12 | 11 |
| 16356T>Y                               | 1  | 13 | 12 |
| 16378C>Y, 387C>Y, 523-524insAC/non-ins | 1  | 14 | 13 |
| 16549C>Y, 523-524insAC/non-ins         | 1  | 15 | 14 |
| 16559A>R, 292T>C                       | 1  | 16 | 15 |
| 109G>R, 8C/9C                          | 1  | 17 | 16 |
| 172T>Y, 225G>R, 7C/8C                  | 1  | 18 | 17 |
| 187G>G/C                               | 1  | 19 | 18 |
| 197A>R                                 | 1  | 20 | 19 |
| 215A>G, 8C/9C                          | 1  | 21 | 20 |
| 290-291delAA/non-del                   | 1  | 22 |    |
| 305C>Y, 7C                             | 1  | 23 | 21 |
| 323G>R                                 | 1  | 24 | 22 |
| 333T>Y                                 | 1  | 25 | 23 |
| 393T>Y                                 | 1  | 26 | 24 |
| 426A>A/T                               | 1  | 27 | 25 |
| 488A>G                                 | 1  | 28 | 26 |
| 574A>R                                 | 1  | 29 | 27 |
| 578T>Y                                 | 1  | 30 | 28 |
| 523-524insAC/non-ins                   | 2  | 31 |    |
| 7C                                     | 2  | 32 |    |
| 7C/8C                                  | 3  | 33 |    |
| 7C/8C/9C                               | 1  | 34 |    |
| 8C/9C                                  | 3  | 35 |    |
| A-3 Aggregate sequence                 | 55 | 1  |    |
| 16034G>R                               | 1  | 2  | 1  |
| 16051A>R                               | 1  | 3  | 2  |
| 16052C>Y, 16263T>Y                     | 1  | 4  | 3  |
| 16083C>Y, 7C/8C/9C                     | 1  | 5  | 4  |
| 16189T>C, 16191insC/non-ins, 7C        | 1  | 6  | 5  |
| 16189T>C, 7C                           | 1  | 7  |    |
| 16189T>Y, 7C                           | 1  | 8  | 6  |
| 16192C>Y, 112C>Y                       | 1  | 9  | 7  |
| 16192C>Y, 8C/9C                        | 1  | 10 | 8  |
| 16221C>Y                               | 1  | 11 | 9  |
| 16267C>Y, 80C>Y                        | 1  | 12 | 10 |
| 16311T>C                               | 1  | 13 | 11 |
| 16324T>Y, 204T>C, 7C                   | 1  | 14 | 12 |
| 16380C>Y                               | 1  | 15 | 13 |
| 16468T>Y                               | 1  | 16 | 14 |
| 16568T>Y, 523-524insAC/non-ins         | 1  | 17 | 15 |
| 12T>Y, 523-524insAC/non-ins            | 1  | 18 | 16 |
| 310T>Y (C-tract not counted)           | 2  | 19 | 17 |
| 385A>R, 8C/9C                          | 1  | 20 | 18 |
| 512A>R                                 | 1  | 21 | 19 |
| 585A>R, 8C/9C                          | 1  | 22 | 20 |
| 7C/8C                                  | 5  | 23 |    |
| 7C/8C/9C                               | 3  | 24 |    |
| 8C/9C                                  | 8  | 25 |    |

|                 |                                     |    |    |    |
|-----------------|-------------------------------------|----|----|----|
| A-4             | Aggregate sequence                  | 57 | 1  |    |
|                 | 16129G>R, 466T>C                    | 1  | 2  | 1  |
|                 | 16250C>Y                            | 1  | 3  | 2  |
|                 | 16267C>Y                            | 1  | 4  | 3  |
|                 | 16544T>Y, 523-524non-ins            | 1  | 5  | 4  |
|                 | 215A>G                              | 2  | 6  | 5  |
|                 | 215A>G, 523-524insAC/non-ins        | 1  | 7  |    |
|                 | 217T>Y, 523-524insAC/non-ins        | 1  | 8  | 6  |
|                 | 227A>R                              | 1  | 9  | 7  |
|                 | 279T>G/T                            | 1  | 10 | 8  |
|                 | 523-524insAC/non-ins                | 10 | 11 |    |
|                 | 7/8C                                | 3  | 12 |    |
|                 | 8/9C                                | 13 | 13 |    |
| A-5             | Aggregate sequence                  | 53 | 1  |    |
|                 | 16172T>Y                            | 1  | 2  | 1  |
|                 | 16192C (same to CRS), 189A>G        | 1  | 3  | 2  |
|                 | 16197C>Y, 8/9C                      | 1  | 4  | 3  |
|                 | 16249T>Y, 523-524insAC/non-ins      | 1  | 5  | 4  |
|                 | 16251C>Y, 523-524insAC/non-ins      | 1  | 6  | 5  |
|                 | 16272A>R                            | 1  | 7  | 6  |
|                 | 16309A>R, 523-524non-ins            | 1  | 8  | 7  |
|                 | 16325T>Y                            | 1  | 9  | 8  |
|                 | 16452T>Y, 8/9C                      | 1  | 10 | 9  |
|                 | 16482insA/non-ins, 204T>Y           | 1  | 11 | 10 |
|                 | 10T>Y                               | 1  | 12 | 11 |
|                 | 18C>Y                               | 1  | 13 | 12 |
|                 | 146T>Y                              | 1  | 14 | 13 |
|                 | 200A>R, 8/9C                        | 1  | 15 | 14 |
|                 | 265T>Y, 266T>Y                      | 1  | 16 | 15 |
|                 | 298C>Y                              | 1  | 17 | 16 |
|                 | 310T>Y                              | 1  | 18 | 17 |
|                 | 346T>Y                              | 1  | 19 | 18 |
|                 | 401T>Y                              | 1  | 20 | 19 |
|                 | 472A>R                              | 1  | 21 | 20 |
|                 | 627G>R, 8C/9C                       | 1  | 22 | 21 |
|                 | 7/8C                                | 1  | 23 |    |
|                 | 7/8C/9C                             | 2  | 24 |    |
|                 | 8/9C                                | 10 | 25 |    |
|                 | 523-524insAC/ins2AC                 | 1  | 26 |    |
|                 | 523-524insAC/non-ins                | 5  | 27 |    |
| A-6             | Aggregate sequence                  | 63 | 1  |    |
|                 | 16079C>Y, 1G>R                      | 1  | 2  | 1  |
|                 | 16145G>A                            | 2  | 3  | 2  |
|                 | 16145G>R                            | 8  | 4  | 3  |
|                 | 16145G>R, 8C/9C                     | 1  | 5  |    |
|                 | 16263delT/non-del                   | 1  | 6  |    |
|                 | 150C>Y                              | 1  | 7  | 4  |
|                 | 585A>R                              | 1  | 8  | 5  |
|                 | 7C/8C                               | 1  | 9  |    |
|                 | 8C/9C                               | 10 | 10 |    |
|                 | 8C/9C, 523-524insAC/non-ins         | 1  | 11 |    |
|                 | 523-524insAC/non-ins                | 5  | 12 |    |
|                 |                                     | 95 |    |    |
| <b>Family B</b> |                                     |    |    |    |
| B-1             | Aggregate sequence (9C/10C/11C/12C) | 21 | 1  |    |
|                 | 16049G>R, 182C>Y, 9C/10C/11C        | 1  | 2  | 1  |
|                 | 16093T>Y, 9C/10C/11C                | 1  | 3  | 2  |

|                                            |    |    |    |
|--------------------------------------------|----|----|----|
| 16110G>R, 9C/10C/11C                       | 1  | 4  | 3  |
| 16129G>A, 16540C>Y, 9C/10C                 | 1  | 5  | 4  |
| 16131T>C, 9C/10C                           | 1  | 6  | 5  |
| 16187C>Y, 9C/10C/11C/12C                   | 1  | 7  | 6  |
| 16264C>Y, 570C>Y, 9C/10C                   | 1  | 8  | 7  |
| 16295C>Y, 9C/10C/11C                       | 1  | 9  | 8  |
| 16319G>R, 8C/9C/10C                        | 1  | 10 | 9  |
| 16321C>Y, 9C/10C/11C/12C                   | 1  | 11 | 10 |
| 16400C>Y, 9C/10C/11C                       | 1  | 12 | 11 |
| 16408C>Y, 540A>R, 8C/9C/10C                | 1  | 13 | 12 |
| 16418T>Y, 466T>Y, 9C/10C/11C               | 1  | 14 | 13 |
| 16475T>Y, 9C/10C                           | 1  | 15 | 14 |
| 16529T>Y, 9C/10C                           | 1  | 16 | 15 |
| 16544T>Y, 9C/10C/11C/12C                   | 1  | 17 | 16 |
| 14T>Y, 9C/10C/11C                          | 1  | 18 | 17 |
| 48C>Y, 9C/10C                              | 1  | 19 | 18 |
| 64C>T, 9C/10C/11C/12C                      | 1  | 20 | 19 |
| 112C>Y, 9C/10C/11C                         | 1  | 21 | 20 |
| 113C>Y, 9C/10C/11C                         | 1  | 22 | 21 |
| 133T>Y, 204T>C, 9C/10C/11C                 | 1  | 23 | 22 |
| 181A>R, 9C/10C/11C/12C                     | 1  | 24 | 23 |
| 182C>Y, 8C/9C/10C                          | 1  | 25 | 24 |
| 182C>Y, 9C/10C/11C/12C                     | 1  | 26 |    |
| 230A>R, 9C/10C/11C/12C                     | 1  | 27 | 25 |
| 305C>Y, 9C/10C/11C                         | 1  | 28 | 26 |
| 368A>R, 492A>R, 9C/10C/11C                 | 1  | 29 | 27 |
| 436C>Y, 9C/10C/11C                         | 1  | 30 | 28 |
| 470A>R, 9C/10C                             | 1  | 31 | 29 |
| 490A>R, 9C/10C/11C                         | 1  | 32 | 30 |
| 509C>Y, 9C/10C/11C                         | 1  | 33 | 31 |
| 630C>Y, 9C/10C/11C/12C                     | 1  | 34 | 32 |
| 8C/9C                                      | 1  | 35 |    |
| 8C/9C/10C                                  | 2  | 36 |    |
| 8C/9C/10C/11C                              | 3  | 37 |    |
| 9C/10C                                     | 15 | 38 |    |
| 9C/10C/11C                                 | 20 | 39 |    |
| B-2 Aggregate sequence (9C/10C)            | 21 | 1  |    |
| 16024T>Y, 16381T>Y, 9C/10C                 | 1  | 2  | 1  |
| 16068T>Y, 9C/10C                           | 1  | 3  | 2  |
| 16093T>Y, 9C/10C/11C                       | 1  | 4  | 3  |
| 16100A>R, 9C/10C                           | 1  | 5  | 4  |
| 16131T>Y, 9C/10C/11C/12C                   | 1  | 6  | 5  |
| 16147C>Y, 9C/10C/11C/12C                   | 1  | 7  | 6  |
| 16150C>Y, 291delA/non-del, 9C/10C/11C      | 1  | 8  | 7  |
| 16187C>Y, 9C/10C/11C/12C                   | 1  | 9  | 8  |
| 16256C>Y, 9C/10C/11C/12C                   | 1  | 10 | 9  |
| 16258A>R, 9C/10C/11C/12C                   | 1  | 11 | 10 |
| 16274G>R, 405T>C, 9C/10C/11C               | 1  | 12 | 11 |
| 16278C>T, 9C/10C                           | 1  | 13 | 12 |
| 16298T>Y, 422T>Y, 9C/10C/11C               | 1  | 14 | 13 |
| 16318A>R, 9C/10C/11C/12C                   | 1  | 15 | 14 |
| 16356T>Y, 296C>Y, 9C/10C/11C               | 1  | 16 | 15 |
| 16388G>R, 16466A>R, 521A>R, 9C/10C/11C/12C | 1  | 17 | 16 |
| 16430A>R, 9C/10C/11C                       | 1  | 18 | 17 |
| 16438G>R, 9C/10C/11C/12C                   | 1  | 19 | 18 |
| 16440T>Y, 8C/9C                            | 1  | 20 | 19 |
| 16443T>Y, 9C/10C/11C/12C                   | 1  | 21 | 20 |
| 16473G>R, 8C/9C/10C                        | 1  | 22 | 21 |

|                                            |    |    |    |
|--------------------------------------------|----|----|----|
| 67G>R, 9C/10C/11C/12C                      | 1  | 23 | 22 |
| 69G>R, 9C/10C                              | 1  | 24 | 23 |
| 105C>Y, 298C>Y, 9C/10C/11C                 | 1  | 25 | 24 |
| 111A>R, 9C/10C/11C/12C                     | 1  | 26 | 25 |
| 151C>Y, 581A>R, 8C/9C/10C/11C              | 1  | 27 | 26 |
| 204T>Y, 9C/10C/11C                         | 1  | 28 | 27 |
| 371C>Y, 9C/10C/11C/12C                     | 1  | 29 | 28 |
| 392T>Y, 9C/10C                             | 1  | 30 | 29 |
| 419A>R, 9C/10C                             | 1  | 31 | 30 |
| 448A>R, 9C/10C/11C                         | 1  | 32 | 31 |
| 453T>Y, 9C/10C/11C/12C                     | 1  | 33 | 32 |
| 483C>Y, 9C/10C                             | 1  | 34 | 33 |
| 515A>R, 9C/10C                             | 1  | 35 | 34 |
| 520C>Y, 9C/10C/11C/12C                     | 1  | 36 | 35 |
| 573delC/non-del, 9C/10C                    | 1  | 37 |    |
| 595C>Y, 9C/10C/11C                         | 1  | 38 | 36 |
| 8C/9C/10C                                  | 2  | 39 |    |
| 8C/9C/10C/11C                              | 3  | 40 |    |
| 9C/10C/11C                                 | 18 | 41 |    |
| 9C/10C/11C/12C                             | 13 | 42 |    |
| <br>                                       |    |    |    |
| B-3 Aggregate sequence (9C/10C/11C)        | 15 | 1  |    |
| 16014C>Y, 272A>R, 9C/10C/11C               | 1  | 2  | 1  |
| 16024T>Y, 16086T>Y, 9C/10C/11C             | 1  | 3  | 2  |
| 16032T>Y, 308C>Y, 9C/10C                   | 1  | 4  | 3  |
| 16062A>A/T, 9C/10C/11C                     | 1  | 5  | 4  |
| 16073C>Y, 9C/10C/11C/12C                   | 1  | 6  | 5  |
| 16081A>R, 9C/10C/11C/12C                   | 1  | 7  | 6  |
| 16093T>C, 9C/10C/11C/12C                   | 1  | 8  | 7  |
| 16105T>Y, 16396T>Y, 9C/10C/11C/12C         | 1  | 9  | 8  |
| 16110G>R, 9C/10C/11C                       | 1  | 10 | 9  |
| 16129G>R, 152T>Y, 9C/10C                   | 1  | 11 | 10 |
| 16129G>R, 9C/10C/11C/12C                   | 1  | 12 | 11 |
| 16131T>C, 146T>Y, 9C/10C/11C/12C           | 1  | 13 | 12 |
| 16131T>C, 8C/9C                            | 1  | 14 | 13 |
| 16181A>C, 9C/10C/11C/12C                   | 1  | 15 | 14 |
| 16184C>Y, 183A>R, 9C/10C/11C/12C           | 1  | 16 | 15 |
| 16187C>Y, 198C>Y, 9C/10C/11C               | 1  | 17 | 16 |
| 16218C>Y, 523-524delAC/non-del, 9C/10C/11C | 1  | 18 | 17 |
| 16234C>Y, 9C/10C                           | 1  | 19 | 18 |
| 16264C>Y, 9C/10C/11C/12C                   | 1  | 20 | 19 |
| 16336G>R, 16563C>Y, 71G>R, 9C/10C/11C/12C  | 1  | 21 | 20 |
| 16362T>Y, 9C/10C/11C                       | 1  | 22 | 21 |
| 16488C>T, 10T>Y, 111A>G, 10C/11C/12C       | 1  | 23 | 22 |
| 16513T>Y, 9C/10C                           | 1  | 24 | 23 |
| 7A>R, 9C/10C/11C/12C                       | 1  | 25 | 24 |
| 22T>Y, 178A>R, 573insC, 8C/9C/10C          | 1  | 26 | 25 |
| 110C>Y, 9C/10C/11C/12C                     | 1  | 27 | 26 |
| 125T>T/A, 8C/9C/10C/11C                    | 1  | 28 | 27 |
| 133T>Y, 453T>Y, 9C/10C                     | 1  | 29 | 28 |
| 146T>Y, 9C/10C/11C/12C                     | 1  | 30 | 29 |
| 153A>A/C, 9C/10C                           | 1  | 31 | 30 |
| 157T>Y, 9C/10C/11C/12C                     | 1  | 32 | 31 |
| 169A>R, 9C/10C/11C                         | 1  | 33 | 32 |
| 214A>R, 9C/10C/11C                         | 1  | 34 | 33 |
| 304C>A, 11C/12C                            | 1  | 35 | 34 |
| 304C>Y, 544C>Y, 8C/9C/10C/11C              | 1  | 36 | 35 |
| 307C>Y, 9C/10C                             | 1  | 37 | 36 |
| 310T>Y, 540A>R, 9C/10C                     | 1  | 38 | 37 |



|     |                                                |    |    |    |
|-----|------------------------------------------------|----|----|----|
|     | 370C>Y, 9C/10C/11C/12C                         | 1  | 39 | 38 |
|     | 439A>A/T, 9C/10C                               | 1  | 40 | 39 |
|     | 454T>Y, 9C/10C/11C                             | 1  | 41 | 40 |
|     | 489T>C, 8C/9C/10C/11C                          | 1  | 42 | 41 |
|     | 573insC/non-ins, 9C/10C                        | 1  | 43 |    |
|     | 609C>Y, 9C/10C/11C                             | 1  | 44 | 42 |
|     | 8C/9C                                          | 4  | 45 |    |
|     | 8C/9C/10C                                      | 1  | 46 |    |
|     | 9C/10C                                         | 9  | 47 |    |
|     | 9C/10C/11C/12C                                 | 14 | 48 |    |
| B-4 | Aggregate sequence (9C/10C/11C)                | 22 | 1  |    |
|     | 16026C>T, 9C/10C/11C                           | 1  | 2  | 1  |
|     | 16086T>C, 454T>Y, 9C/10C/11C/12C               | 1  | 3  | 2  |
|     | 16099C>Y, 8C/9C/10C                            | 1  | 4  | 3  |
|     | 16115C>Y, 9C/10C/11C                           | 1  | 5  | 4  |
|     | 16150C>Y, 511C>Y, 8C/9C/10C/11C                | 1  | 6  | 5  |
|     | 16179C>T, 9C/10C/11C                           | 1  | 7  | 6  |
|     | 16181A>C, 9C/10C/11C                           | 1  | 8  | 7  |
|     | (16194-16195)AT>CC, 9C/10C/11C                 | 1  | 9  | 8  |
|     | 16214C>T, 9C/10C/11C/12C                       | 1  | 10 | 9  |
|     | 16256C>Y, 8C/9C/10C/11C                        | 1  | 11 | 10 |
|     | 16321C>Y, 9C/10C/11C/12C                       | 1  | 12 | 11 |
|     | 16368T>C, 8C/9C/10C                            | 1  | 13 | 12 |
|     | 16381T>Y, 9C/10C/11C/12C                       | 1  | 14 | 13 |
|     | 16387A>R, 9C/10C/11C                           | 1  | 15 | 14 |
|     | 16542C>Y, 9C/10C/11C                           | 1  | 16 | 15 |
|     | 7A>R, 424T>Y, 9C/10C                           | 1  | 17 | 16 |
|     | 43C>Y, 9C/10C/11C                              | 1  | 18 | 17 |
|     | 107G>R, 210A>R, 9C/10C/11C/12C                 | 1  | 19 | 18 |
|     | 161T>Y, 9C/10C/11C/12C                         | 1  | 20 | 19 |
|     | 162C>Y, 9C/10C/11C                             | 1  | 21 | 20 |
|     | 178A>R, 8C/9C/10C/11C                          | 1  | 22 | 21 |
|     | 195T>Y, 9C/10C/11C                             | 1  | 23 | 22 |
|     | 198C>Y, 9C/10C/11C/12C                         | 1  | 24 | 23 |
|     | 204T>C, 9C/10C/11C                             | 1  | 25 | 24 |
|     | 421T>Y, 9C/10C                                 | 1  | 26 | 25 |
|     | 508A>R, 8C/9C/10C/11C                          | 1  | 27 | 26 |
|     | 514C>Y, 9C/10C/11C/12C                         | 1  | 28 | 27 |
|     | 593T>C, 8C/9C/10C                              | 1  | 29 | 28 |
|     | 595C>Y, 9C/10C/11C/12C                         | 1  | 30 | 29 |
|     | 523-524delAC/non-del, 9C/10C/11C               | 1  | 31 |    |
|     | 8C/9C/10C                                      | 4  | 32 |    |
|     | 8C/9C/10C/11C                                  | 2  | 33 |    |
|     | 9C/10C                                         | 18 | 34 |    |
|     | 9C/10C/11C/12C                                 | 20 | 35 |    |
| B-5 | Aggregate sequence (9C/10C/11C/12C)            | 25 | 1  |    |
|     | 16042G>A, 2A>R, 463C>Y, 8C/9C/10C/11C          | 1  | 2  | 1  |
|     | 16069C>Y, 16129G>R, 9C/10C/11C/12C             | 1  | 3  | 2  |
|     | 16087A>R, 16268C>Y, 16283A>R, 8C/9C            | 1  | 4  | 3  |
|     | 16093T>C, 9C/10C/11C                           | 1  | 5  | 4  |
|     | 16129G>A, 9C/10C/11C                           | 1  | 6  | 5  |
|     | 16129G>R, 9C/10C/11C/12C                       | 1  | 7  | 6  |
|     | 16140T>Y, 9C/10C/11C/12C                       | 1  | 8  | 7  |
|     | 16190C>Y, 9C/10C                               | 1  | 9  | 8  |
|     | 16214C>Y, 16463A>R, 149T>Y, 9C/10C/11C/12C/13C | 1  | 10 | 9  |
|     | 16261C>Y, 16559A>R, 8C/9C                      | 1  | 11 | 10 |
|     | 16262C>Y, 9C/10C/11C                           | 1  | 12 | 11 |

|                                                            |    |    |    |
|------------------------------------------------------------|----|----|----|
| 16269A>R, 146T>C, 9C/10C/11C/12C                           | 1  | 13 | 12 |
| 16282C>Y, 9C/10C                                           | 1  | 14 | 13 |
| 16291C>Y, 9C/10C/11C/12C                                   | 1  | 15 | 14 |
| 16328C>Y, 16526G>R, 9C/10C                                 | 1  | 16 | 15 |
| 16353C>Y, 16548C>Y, 242C>Y, 9C/10C/11C/12C                 | 1  | 17 | 16 |
| 16374A>R, 9C/10C                                           | 1  | 18 | 17 |
| 16411C>Y, 9C/10C/11C/12C                                   | 1  | 19 | 18 |
| 2A>R, 71delG/non-del, 9C/10C/11C/12C, 523-524delAC/non-del | 1  | 20 | 19 |
| 21A>R, 9C/10C/11C                                          | 1  | 21 | 20 |
| 24A>R, 9C/10C                                              | 1  | 22 | 21 |
| 51T>Y, 9C/10C/11C                                          | 1  | 23 | 22 |
| 63T>Y, 8C/9C                                               | 1  | 24 | 23 |
| 97G>A, 9C/10C/11C                                          | 1  | 25 | 24 |
| 142T>Y, 9C/10C/11C                                         | 1  | 26 | 25 |
| 143G>R, 9C/10C/11C                                         | 1  | 27 | 26 |
| 144C>Y, 9C/10C, 523-524delAC/non-del                       | 1  | 28 | 27 |
| 146T>C, 220T>Y, 9C/10C/11C/12C                             | 1  | 29 | 28 |
| 151C>Y, 9C/10C                                             | 1  | 30 | 29 |
| 155T>Y, 9C/10C/11C/12C                                     | 1  | 31 | 30 |
| 204T>C, 9C/10C                                             | 1  | 32 | 31 |
| 204T>C, 9C/10C/11C                                         | 1  | 33 |    |
| 217T>C, 9C/10C                                             | 1  | 34 | 32 |
| 246T>Y, 9C/10C/11C                                         | 1  | 35 | 33 |
| 247G>R, 9C/10C/11C                                         | 1  | 36 | 34 |
| 435C>Y, 500C>Y, 9C/10C/11C                                 | 1  | 37 | 35 |
| 436C>Y, 9C/10C                                             | 1  | 38 | 36 |
| 462C>Y, 9C/10C                                             | 1  | 39 | 37 |
| 519A>A/T, 9C/10C/11C                                       | 1  | 40 | 38 |
| 521A>R, 9C/10C/11C                                         | 1  | 41 | 39 |
| 525C>Y, 9C/10C/11C/12C                                     | 1  | 42 | 40 |
| 8C/9C                                                      | 1  | 43 |    |
| 8C/9C/10C                                                  | 1  | 44 |    |
| 8C/9C/10C/11C                                              | 1  | 45 |    |
| 8C/9C/10C/11C/12C                                          | 1  | 46 |    |
| 9C/10C                                                     | 12 | 47 |    |
| 9C/10C/11C                                                 | 12 | 48 |    |
| 9C/10C/11C/12C/13C                                         | 1  | 49 |    |
| B-6 Aggregate sequence (9C/10C/11C)                        | 22 | 1  |    |
| 16020T>Y, 195T>Y, 9C/10C/11C/12C                           | 1  | 2  | 1  |
| 16029T>Y, 182C>T, 9C/10C/11C/12C                           | 1  | 3  | 2  |
| 16029T>Y, 577G>R, 9C/10C                                   | 1  | 4  | 3  |
| 16036G>R, 9C/10C                                           | 1  | 5  | 4  |
| 16135delA/non-del, 9C/10C                                  | 1  | 6  |    |
| 16150C>Y, 9C/10C/11C/12C                                   | 1  | 7  | 5  |
| 16151C>Y, 16256C>Y, 9C/10C                                 | 1  | 8  | 6  |
| 16165A>R, 16374A>R, 9C/10C                                 | 1  | 9  | 7  |
| 16173C>Y, 9C/10C/11C                                       | 1  | 10 | 8  |
| 16177A>R, 9C/10C/11C                                       | 1  | 11 | 9  |
| 16235A>R, 9C/10C                                           | 1  | 12 | 10 |
| 16249T>Y, 9C/10C/11C                                       | 1  | 13 | 11 |
| 16278C>Y, 9C/10C/11C/12C                                   | 1  | 14 | 12 |
| 16293A>R, 9C/10C/11C                                       | 1  | 15 | 13 |
| 16293A>R, 9C/10C/11C, 523-524delAC/non-del                 | 1  | 16 |    |
| 16312A>R, 2A>R, 152T>Y, 182C>Y, 9C/10C/11C/12C             | 1  | 17 | 14 |
| 16314A>R, 16423A>R, 9C/10C/11C                             | 1  | 18 | 15 |
| 16368T>C, 9C/10C/11C/12C                                   | 1  | 19 | 16 |
| 16389G>R, 8C/9C/10C                                        | 1  | 20 | 17 |
| 16459C>Y, 500C>Y, 507T>T/A, 9C/10C/11C                     | 1  | 21 | 18 |

|                                                |    |    |    |
|------------------------------------------------|----|----|----|
| 16469T>T/G, 9C/10C/11C/12C                     | 1  | 22 | 19 |
| 16482delA/non-del, 9C/10C/11C/12C              | 1  | 23 |    |
| 13A>R, 9C/10C/11C                              | 1  | 24 | 20 |
| 59T>Y, 8C/9C/10C                               | 1  | 25 | 21 |
| 70G>R, 9C/10C/11C                              | 1  | 26 | 22 |
| 142T>Y, 9C/10C                                 | 1  | 27 | 23 |
| 146T>Y, 9C/10C/11C/12C                         | 1  | 28 | 24 |
| 149T>Y, 9C/10C/11C                             | 1  | 29 | 25 |
| 157T>Y, 9C/10C/11C/12C                         | 1  | 30 | 26 |
| 182C>T, 9C/10C/11C                             | 1  | 31 | 27 |
| 182C>Y, 9C/10C/11C                             | 2  | 32 | 28 |
| 182C>Y, 9C/10C/11C                             |    |    |    |
| 182C>T, 9C/10C/11C/12C                         | 1  | 33 |    |
| 198C>Y, 9C/10C/11C                             | 1  | 34 | 29 |
| 208T>Y, 9C/10C/11C/12C                         | 1  | 35 | 30 |
| 266T>Y, 9C/10C                                 | 1  | 36 | 31 |
| 303C>Y, 9C/10C                                 | 1  | 37 | 32 |
| 306C>Y, 9C/10C/11C                             | 1  | 38 | 33 |
| 484A>R, 9C/10C/11C                             | 1  | 39 | 34 |
| 487A>G, 9C/10C/11C                             | 1  | 40 | 35 |
| 509C>Y, 9C/10C/11C                             | 1  | 41 | 36 |
| 553C>Y, 9C/10C/11C                             | 1  | 42 | 37 |
| 605T>C, 9C/10C/11C                             | 1  | 43 | 38 |
| 8C/9C/10C                                      | 5  | 44 |    |
| 9C/10C                                         | 14 | 45 |    |
| 9C/10C/11C/12C                                 | 10 | 46 |    |
| 9C/10C/11C/12C/13C                             | 1  | 47 |    |
| B-7 Aggregate sequence (9C/10C/11C)            | 22 | 1  |    |
| 16034G>R, 16105T>Y, 16430A>R, 16487A>R, 9C/10C | 1  | 2  | 1  |
| 16037A>R, 9C/10C/11C                           | 1  | 3  | 2  |
| 16046T>Y, 9C/10C/11C                           | 1  | 4  | 3  |
| 16073C>Y, 127T>Y, 9C/10C                       | 1  | 5  | 4  |
| 16103A>R, 9C/10C/11C                           | 1  | 6  | 5  |
| 16114C>Y, 8C/9C/10C/11C                        | 1  | 7  | 6  |
| 16129G>R, 9C/10C/11C                           | 1  | 8  | 7  |
| 16129G>R, 9C/10C/11C/12C                       | 1  | 9  | 8  |
| 16175A>R, 16183A>Y, 9C/10C                     | 1  | 10 | 9  |
| 16226A>R, 629T>Y, 9C/10C                       | 1  | 11 | 10 |
| 16254A>R, 9C/10C                               | 1  | 12 | 11 |
| 16286C>Y, 113C>Y, 635C>Y, 9C/10C/11C           | 1  | 13 | 12 |
| 16482A>R, 9C/10C/11C/12C                       | 1  | 14 | 13 |
| 16545T>Y, 9C/10C                               | 1  | 15 | 14 |
| 18C>Y, 9C/10C/11C/12C                          | 1  | 16 | 15 |
| 91C>Y, 9C/10C/11C/12C                          | 1  | 17 | 16 |
| 197A>R, 9C/10C/11C/12C                         | 1  | 18 | 17 |
| 272A>R, 9C/10C/11C                             | 1  | 19 | 18 |
| 302A>A/C, 9C/10C/11C                           | 1  | 20 | 19 |
| 302delA, 9C/10C/11C                            | 1  | 21 |    |
| 345C>Y, 9C/10C/11C/12C                         | 1  | 22 | 20 |
| 392T>Y, 9C/10C                                 | 1  | 23 | 21 |
| 489T>Y, 9C/10C/11C                             | 1  | 24 | 22 |
| 494C>Y, 9C/10C/11C                             | 1  | 25 | 23 |
| 502C>Y, 9C/10C/11C                             | 1  | 26 | 24 |
| 516C>Y, 8C/9C/10C                              | 1  | 27 | 25 |
| 522C>Y, 9C/10C/11C                             | 1  | 28 | 26 |
| 537C>Y, 8C/9C/10C/11C                          | 1  | 29 | 27 |
| 548C>Y, 9C/10C/11C                             | 1  | 30 | 28 |
| 635C>Y, 9C/10C/11C                             | 1  | 31 | 29 |

|     |                                            |    |    |    |
|-----|--------------------------------------------|----|----|----|
|     | 8C/9C/10C                                  | 2  | 32 |    |
|     | 8C/9C/10C/11C                              | 1  | 33 |    |
|     | 8C/9C/10C/11C/12C                          | 1  | 34 |    |
|     | 8C/9C/10C/11C/12C, 523-524delAC/non-del    | 1  | 35 |    |
|     | 9C/10C                                     | 22 | 36 |    |
|     | 9C/10C, 523-524delAC/non-del               | 1  | 37 |    |
|     | 9C/10C/11C/12C                             | 15 | 38 |    |
| B-8 | Aggregate sequence (9C/10C/11C)            | 30 | 1  |    |
|     | 16053C>Y, 560C>Y, 9C/10C/11C               | 1  | 2  | 1  |
|     | 16073C>Y, 9C/10C/11C/12C                   | 1  | 3  | 2  |
|     | 16119A>R, 16455G>R, 633A>R, 9C/10C/11C/12C | 1  | 4  | 3  |
|     | 16129G>R, 9C/10C                           | 1  | 5  | 4  |
|     | 16129G>R, 9C/10C/11C                       | 1  | 6  |    |
|     | 16131T>Y, 9C/10C/11C                       | 1  | 7  | 5  |
|     | 16171A>R, 16311T>Y, 9C/10C/11C/12C         | 1  | 8  | 6  |
|     | 16214C>T, 9C/10C/11C                       | 1  | 9  | 7  |
|     | 16234C>Y, 9C/10C/11C                       | 1  | 10 | 8  |
|     | 16250C>A/C, 16374A>R, 9C/10C/11C           | 1  | 11 | 9  |
|     | 16260C>Y, 9C/10C/11C/12C                   | 1  | 12 | 10 |
|     | 16262C>Y, 40T>Y, 8C/9C                     | 1  | 13 | 11 |
|     | 16269A>R, 9C/10C                           | 1  | 14 | 12 |
|     | 16345A>A/T, 16354C>Y, 9C/10C/11C           | 1  | 15 | 13 |
|     | 16367A>R, 146T>Y, 9C/10C/11C/12C           | 1  | 16 | 14 |
|     | 16370G>R, 9C/10C/11C                       | 1  | 17 | 15 |
|     | 16469T>Y, 9C/10C/11C                       | 1  | 18 | 16 |
|     | 16509T>Y, 9C/10C/11C                       | 1  | 19 | 17 |
|     | 11C>Y, 9C/10C/11C                          | 1  | 20 | 18 |
|     | 22T>Y, 9C/10C/11C                          | 1  | 21 | 19 |
|     | 89T>Y, 542C>Y, 9C/10C/11C/12C              | 1  | 22 | 20 |
|     | 102A>R, 9C/10C/11C/12C                     | 1  | 23 | 21 |
|     | 146T>Y, 9C/10C/11C/12C                     | 1  | 24 | 22 |
|     | 156A>R, 9C/10C                             | 1  | 25 | 23 |
|     | 178A>R, 9C/10C/11C                         | 1  | 26 | 24 |
|     | 182C>T, 9C/10C/11C/12C                     | 1  | 27 | 25 |
|     | 422T>Y, 8C/9C                              | 1  | 28 | 26 |
|     | 483C>Y, 9C/10C                             | 1  | 29 | 27 |
|     | 540A>R, 9C/10C                             | 1  | 30 | 28 |
|     | 8C/9C                                      | 3  | 31 |    |
|     | 8C/9C/10C                                  | 1  | 32 |    |
|     | 9C/10C                                     | 23 | 33 |    |
|     | 9C/10C/11C, 523-524delAC/non-del           | 1  | 34 |    |
|     | 9C/10C/11C/12C                             | 7  | 35 |    |
| B-9 | Aggregate sequence (9C/10C/11C/12C)        | 20 | 1  |    |
|     | 16052C>Y, 9C/10C/11C/12C                   | 1  | 2  | 1  |
|     | 16057C>Y, 9C/10C/11C/12C                   | 1  | 3  | 2  |
|     | 16084G>R, 16322A>R, 529G>A, 10C/11C/12C    | 1  | 4  | 3  |
|     | 16088T>Y, 483C>Y, 611G>R, 9C/10C/11C/12C   | 1  | 5  | 4  |
|     | 16096G>R, 16134C>Y, 9C/10C/11C/12C         | 1  | 6  | 5  |
|     | 16140T>Y, 9C/10C/11C/12C                   | 1  | 7  | 6  |
|     | 16146A>R, 9C/10C/11C/12C                   | 1  | 8  | 7  |
|     | 16167C>Y, 9C/10C                           | 1  | 9  | 8  |
|     | 16169C>Y, 9C/10C/11C/12C                   | 1  | 10 | 9  |
|     | 16230A>R, 9C/10C                           | 1  | 11 | 10 |
|     | 16239C>Y, 9C/10C                           | 1  | 12 | 11 |
|     | 16265A>R, 9C/10C                           | 1  | 13 | 12 |
|     | 16290C>Y, 193A>R, 9C/10C/11C/12C           | 1  | 14 | 13 |
|     | 16291C>Y, 9C/10C/11C                       | 1  | 15 | 14 |

|                                                  |    |    |    |
|--------------------------------------------------|----|----|----|
| 16309A>R, 9C/10C/11C                             | 1  | 16 | 15 |
| 16328C>Y, 9C/10C/11C                             | 1  | 17 | 16 |
| 16333A>R, 619T>Y, 9C/10C/11C                     | 1  | 18 | 17 |
| 16337C>Y, 9C/10C/11C/12C                         | 1  | 19 | 18 |
| 16399A>R, 16509T>Y, 9C/10C                       | 1  | 20 | 19 |
| 16443T>Y, 9C/10C/11C                             | 1  | 21 | 20 |
| 16468T>Y, 9C/10C                                 | 1  | 22 | 21 |
| 16497A>R, 9C/10C/11C/12C                         | 1  | 23 | 22 |
| 60T>Y, 9C/10C/11C/12C                            | 1  | 24 | 23 |
| 142T>Y, 9C/10C/11C/12C                           | 1  | 25 | 24 |
| 146T>Y, 9C/10C/11C/12C                           | 1  | 26 | 25 |
| 161T>Y, 9C/10C                                   | 1  | 27 | 26 |
| 169A>R, 527C>Y, 9C/10C/11C                       | 1  | 28 | 27 |
| 173T>Y, 9C/10C/11C                               | 1  | 29 | 28 |
| 184G>R, 9C/10C/11C                               | 1  | 30 | 29 |
| 198C>Y, 8C/9C/10C                                | 1  | 31 | 30 |
| 204T>C, 9C/10C/11C/12C                           | 1  | 32 | 31 |
| 208T>T/A, 523-524delAC/non-del, 9C/10C/11C/12C   | 1  | 33 | 32 |
| 219A>R, 9C/10C/11C/12C                           | 1  | 34 | 33 |
| 230A>R, 9C/10C/11C                               | 1  | 35 | 34 |
| 242+TAA/non-ins, 9C/10C/11C/12C                  | 1  | 36 |    |
| 248A>R, 9C/10C                                   | 1  | 37 | 35 |
| 310T>C, long Cs                                  | 1  | 38 | 36 |
| 390A>R, 446A>R, 523-524delAC/non-del, 9C/10C/11C | 1  | 39 | 37 |
| 404C>Y, 8C/9C                                    | 1  | 40 | 38 |
| 419A>R, 9C/10C/11C/12C                           | 1  | 41 | 39 |
| 466T>Y, 9C/10C/11C                               | 1  | 42 | 40 |
| 497C>Y, 9C/10C/11C                               | 1  | 43 | 41 |
| 540A>R, 9C/10C/11C                               | 1  | 44 | 42 |
| 612A>R, 10C/11C/12C                              | 1  | 45 | 43 |
| 523-524delAC/non-del, 8C/9C/10C                  | 1  | 46 |    |
| 523-524delAC/non-del, 9C/10C                     | 1  | 47 |    |
| 8C/9C/10C                                        | 2  | 48 |    |
| 8C/9C/10C/11C                                    | 2  | 49 |    |
| 9C/10C                                           | 8  | 50 |    |
| 10C/11C/12C                                      | 2  | 51 |    |
| 9C/10C/11C                                       | 14 | 52 |    |
| B-10 Aggregate sequence (9C/10C/11C)             | 23 | 1  |    |
| 16056C>Y, 9C/10C/11C/12C                         | 1  | 2  | 1  |
| 16086T>Y, 16122A>R, 8C/9C/10C                    | 1  | 3  | 2  |
| 16093T>C, 9C/10C/11C/12C                         | 1  | 4  | 3  |
| 16124T>Y, 9C/10C                                 | 1  | 5  | 4  |
| 16131T>Y, 179T>Y, 9C/10C/11C/12C                 | 1  | 6  | 5  |
| 16186C>Y, 9C/10C/11C                             | 1  | 7  | 6  |
| 16272A>R, 8C/9C/10C                              | 1  | 8  | 7  |
| 16277A>R, 16547C>Y, 8C/9C/10C                    | 1  | 9  | 8  |
| 16311T>Y, 8C/9C                                  | 1  | 10 | 9  |
| 16317A>R, 9C/10C/11C/12C                         | 1  | 11 | 10 |
| 16368T>Y, 9C/10C/11C                             | 1  | 12 | 11 |
| 16533T>Y, 355C>Y, 9C/10C/11C                     | 1  | 13 | 12 |
| 42T>Y, 9C/10C/11C/12C                            | 1  | 14 | 13 |
| 56A>R, 523-524delAC/non-del, 9C/10C              | 1  | 15 | 14 |
| 58T>Y, 9C/10C/11C/12C                            | 1  | 16 | 15 |
| 142T>Y, 172T>T/G, 9C/10C                         | 1  | 17 | 16 |
| 146T>C, 8C/9C                                    | 1  | 18 | 17 |
| 185G>R, 9C/10C/11C                               | 1  | 19 | 18 |
| 190C>Y, 8C/9C/10C                                | 1  | 20 | 19 |
| 224T>Y, 8C/9C                                    | 1  | 21 | 20 |

|      |                                          |    |    |    |
|------|------------------------------------------|----|----|----|
|      | 235A>R, 9C/10C                           | 1  | 22 | 21 |
|      | 238A>R, 250T>Y, 8C/9C/10C/11C            | 1  | 23 | 22 |
|      | 291A>R, 8C/9C/10C                        | 1  | 24 | 23 |
|      | 403T>Y, 587C>Y, 9C/10C/11C               | 1  | 25 | 24 |
|      | 405T>Y, 9C/10C                           | 1  | 26 | 25 |
|      | 420C>Y, 564G>R, 8C/9C/10C                | 1  | 27 | 26 |
|      | 421T>Y, 9C/10C/11C/12C                   | 1  | 28 | 27 |
|      | 497C>Y, 9C/10C/11C/12C                   | 1  | 29 | 28 |
|      | 536C>Y, 9C/10C/11C                       | 1  | 30 | 29 |
|      | 557C>Y, 9C/10C/11C/12C                   | 1  | 31 | 30 |
|      | 523-524insAC/non-ins, 9C/10C/11C         | 1  | 32 |    |
|      | 8C/9C                                    | 5  | 33 |    |
|      | 8C/9C/10C                                | 4  | 34 |    |
|      | 8C/9C/10C/11C                            | 3  | 35 |    |
|      | 9C/10C                                   | 7  | 36 |    |
|      | 9C/10C/11C/12C                           | 20 | 37 |    |
| B-11 | Aggregate sequence (9C/10C/11C)          | 22 | 1  |    |
|      | 16066A>G, 16123T>Y, 9C/10C/11C           | 1  | 2  | 1  |
|      | 16103A>R, 421T>Y, 512A>R, 9C/10C/11C/12C | 1  | 3  | 2  |
|      | 16150C>Y, 9C/10C                         | 1  | 4  | 3  |
|      | 16182A>Y, 9C/10C                         | 1  | 5  | 4  |
|      | 16222C>Y, 9C/10C/11C                     | 1  | 6  | 5  |
|      | 16226A>R, 9C/10C/11C                     | 1  | 7  | 6  |
|      | 16251C>Y, 9C/10C/11C                     | 1  | 8  | 7  |
|      | 16262delC/non-del, 9C/10C/11C            | 1  | 9  |    |
|      | 16291C>Y, 8C/9C/10C/11C                  | 1  | 10 | 8  |
|      | 16368T>Y, 8C/9C                          | 1  | 11 | 9  |
|      | 16386T>Y, 8C/9C                          | 1  | 12 | 10 |
|      | 16411C>Y, 9C/10C/11C                     | 1  | 13 | 11 |
|      | 16425C>Y, 9C/10C                         | 1  | 14 | 12 |
|      | 16442C>Y, 9C/10C/11C                     | 1  | 15 | 13 |
|      | 16459C>Y, 9C/10C/11C                     | 1  | 16 | 14 |
|      | 16490G>R, 9C/10C                         | 1  | 17 | 15 |
|      | 16495C>Y, 9C/10C/11C/12C                 | 1  | 18 | 16 |
|      | 16534A>R, 8C/9C/10C                      | 1  | 19 | 17 |
|      | 16556A>R, 8C/9C                          | 1  | 20 | 18 |
|      | 19C>Y, 9C/10C/11C                        | 1  | 21 | 19 |
|      | 114C>Y, 449T>Y, 9C/10C                   | 1  | 22 | 20 |
|      | 146T>Y, 9C/10C                           | 1  | 23 | 21 |
|      | 174C>Y, 9C/10C/11C                       | 1  | 24 | 22 |
|      | 234A>R, 9C/10C/11C/12C                   | 1  | 25 | 23 |
|      | 304C>Y, 9C/10C                           | 1  | 26 | 24 |
|      | 404C>Y, 9C/10C/11C                       | 1  | 27 | 25 |
|      | 482T>Y, 8C/9C/10C                        | 1  | 28 | 26 |
|      | 538A>R, 9C/10C                           | 1  | 29 | 27 |
|      | 8C/9C                                    | 5  | 30 |    |
|      | 8C/9C/10C                                | 5  | 31 |    |
|      | 8C/9C/10C/11C                            | 2  | 32 |    |
|      | 8C/9C/10C/11C/12C                        | 1  | 33 |    |
|      | 9C/10C                                   | 20 | 34 |    |
|      | 9C/10C/11C/12C                           | 8  | 35 |    |
| B-12 | Aggregate sequence (9C/10C)              | 25 | 1  |    |
|      | 16029T>Y, 153A>R, 8C/9C/10C              | 1  | 2  | 1  |
|      | 16062A>R, 9C/10C/11C                     | 1  | 3  | 2  |
|      | 16086T>Y, 16129G>A, 8C/9C                | 1  | 4  | 3  |
|      | 16095C>Y, 9C/10C                         | 1  | 5  | 4  |
|      | 16114C>Y, 8C/9C                          | 1  | 6  | 5  |

|                                             |   |    |    |
|---------------------------------------------|---|----|----|
| 16124T>C, 9C/10C/11C/12C                    | 1 | 7  | 6  |
| 16129G>A, 16278C>Y, 8C/9C/10C               | 1 | 8  | 7  |
| 16129G>A, 16476A>R, 9C/10C                  | 1 | 9  | 8  |
| 16129G>A, 204T>C, 9C/10C                    | 1 | 10 | 9  |
| 16129G>A, 462C>Y, 8C/9C/10C                 | 1 | 11 | 10 |
| 16129G>A, 8C/9C                             | 5 | 12 | 11 |
| 16129G>A, 8C/9C/10C                         | 2 | 13 |    |
| 16129G>A, 8C/9C/10C/11C                     | 1 | 14 |    |
| 16129G>A, 9C/10C                            | 6 | 15 |    |
| 16129G>A, 9C/10C/11C                        | 2 | 16 |    |
| 16129G>R, 8C/9C                             | 5 | 17 | 12 |
| 16129G>R, 8C/9C/10C                         | 1 | 18 |    |
| 16129G>R, 8C/9C/10C/11C                     | 1 | 19 |    |
| 16129G>R, 9C/10C                            | 4 | 20 |    |
| 16129G>R, 9C/10C/11C                        | 3 | 21 |    |
| 16129G>R, 9C/10C/11C/12C                    | 1 | 22 |    |
| 16131T>Y, 8C/9C                             | 1 | 23 | 13 |
| 16136T>T/A, 9C/10C                          | 1 | 24 | 14 |
| 16137A>R, 9C/10C/11C/12C                    | 1 | 25 | 15 |
| 16152T>Y, 9C/10C/11C                        | 1 | 26 | 16 |
| 16158A>R, 16272A>R, 8C/9C/10C               | 1 | 27 | 17 |
| 16167C>Y, 9C/10C/11C/12C                    | 1 | 28 | 18 |
| 16184C>Y, 8C/9C                             | 1 | 29 | 19 |
| 16187C>Y, 8C/9C                             | 1 | 30 | 20 |
| 16203A>R, 9C/10C/11C                        | 1 | 31 | 21 |
| 16211C>Y, 8C/9C/10C                         | 1 | 32 | 22 |
| 16228C>T, 9C/10C                            | 1 | 33 | 23 |
| 16250C>Y, 71delG/non-del, 8C/9C             | 1 | 34 | 24 |
| 16263delT/non-del, 4C>Y, 9C/10C/11C         | 1 | 35 | 25 |
| 16307A>R, 8C/9C/10C, 523-524delAC/non-del   | 1 | 36 | 26 |
| 16320C>Y, 8C/9C                             | 1 | 37 | 27 |
| 16336G>R, 8C/9C/10C/11C                     | 1 | 38 | 28 |
| 16377C>Y, 8C/9C/10C                         | 1 | 39 | 29 |
| 16423A>R, 143G>R, 8C/9C/10C                 | 1 | 40 | 30 |
| 16427C>Y, 9C/10C                            | 1 | 41 | 31 |
| 16449C>Y, 9C/10C                            | 1 | 42 | 32 |
| 16463A>R, 9C/10C                            | 1 | 43 | 33 |
| 16464A>R, 9C/10C/11C                        | 1 | 44 | 34 |
| 16486A>R, 8C/9C                             | 1 | 45 | 35 |
| 16519T>C, 8C/9C/10C                         | 1 | 46 | 36 |
| 39C>Y, 8C/9C/10C                            | 1 | 47 | 37 |
| 54G>R, 8C/9C                                | 1 | 48 | 38 |
| 60T>Y, 8C/9C                                | 1 | 49 | 39 |
| 70G>R, 9C/10C/11C/12C, 523-524delAC/non-del | 1 | 50 | 40 |
| 93A>R, 9C/10C                               | 1 | 51 | 41 |
| 112C>Y, 9C/10C/11C                          | 1 | 52 | 42 |
| 133T>Y, 9C/10C/11C                          | 1 | 53 | 43 |
| 156A>R, 9C/10C/11C/12C                      | 1 | 54 | 44 |
| 181A>R, 9C/10C                              | 1 | 55 | 45 |
| 226T>Y, 9C/10C                              | 1 | 56 | 46 |
| 246T>Y, 8C/9C/10C                           | 1 | 57 | 47 |
| 266T>Y, 8C/9C                               | 1 | 58 | 48 |
| 296C>Y, 9C/10C                              | 1 | 59 | 49 |
| 307C>Y, 9C/10C                              | 1 | 60 | 50 |
| 381C>Y, 9C/10C                              | 1 | 61 | 51 |
| 420C>Y, 9C/10C/11C                          | 1 | 62 | 52 |
| 434C>Y, 9C/10C                              | 1 | 63 | 53 |
| 439A>R, 8C/9C/10C                           | 1 | 64 | 54 |
| 468C>Y, 9C/10C                              | 1 | 65 | 55 |

|      |                                       |    |    |    |
|------|---------------------------------------|----|----|----|
|      | 515A>R, 9C/10C                        | 1  | 66 | 56 |
|      | 519A>A/T, 9C/10C/11C/12C              | 1  | 67 | 57 |
|      | 544C>Y, 9C/10C/11C                    | 1  | 68 | 58 |
|      | 570C>Y, 8C/9C                         | 1  | 69 | 59 |
|      | 605T>Y, 8C/9C                         | 1  | 70 | 60 |
|      | 626G>R, 9C/10C/11C                    | 1  | 71 | 61 |
|      | 8C/9C                                 | 22 | 72 |    |
|      | 8C/9C/10C                             | 16 | 73 |    |
|      | 8C/9C/10C/11C                         | 6  | 74 |    |
|      | 9C/10C/11C                            | 16 | 75 |    |
|      | 9C/10C/11C/12C                        | 10 | 76 |    |
| B-13 | Aggregate sequence (9C/10C/11C)       | 59 | 1  |    |
|      | 16022T>Y, 9C/10C                      | 1  | 2  | 1  |
|      | 16036G>R, 470A>R, 9C/10C/11C/12C      | 1  | 3  | 2  |
|      | 16037A>R, 9C/10C                      | 1  | 4  | 3  |
|      | 16052C>Y, 9C/10C/11C                  | 1  | 5  | 4  |
|      | 16095C>Y, 9C/10C/11C                  | 1  | 6  | 5  |
|      | 16111C>Y, 9C/10C                      | 1  | 7  | 6  |
|      | 16129G>A, 9C/10C                      | 1  | 8  | 7  |
|      | 16129G>R, 215A>G, 9C/10C/11C          | 1  | 9  | 8  |
|      | 16134C>Y, 9C/10C                      | 1  | 10 | 9  |
|      | 16137A>R, 9C/10C/11C                  | 1  | 11 | 10 |
|      | 16142C>Y, 204T>Y, 10C/11C/12C         | 1  | 12 | 11 |
|      | 16154T>Y, 9C/10C/11C/12C              | 1  | 13 | 12 |
|      | 16176C>Y, 298C>Y, 9C/10C/11C          | 1  | 14 | 13 |
|      | 16178T>A, 16264C>Y, 8C/9C             | 1  | 15 | 14 |
|      | 16187C>Y, 9C/10C/11C/12C              | 1  | 16 | 15 |
|      | 16231T>Y, 16281A>R, 57T>Y, 9C/10C/11C | 1  | 17 | 16 |
|      | 16242C>Y, 9C/10C                      | 1  | 18 | 17 |
|      | 16246A>R, 9C/10C/11C                  | 1  | 19 | 18 |
|      | 16265A>R, 9C/10C/11C/12C              | 1  | 20 | 19 |
|      | 16266C>Y, 9C/10C/11C                  | 1  | 21 | 20 |
|      | 16281A>R, 9C/10C/11C/12C              | 1  | 22 | 21 |
|      | 16342T>Y, 9C/10C/11C                  | 1  | 23 | 22 |
|      | 16371A>R, 9C/10C/11C/12C              | 1  | 24 | 23 |
|      | 16381delT/non-del, 9C/10C             | 1  | 25 |    |
|      | 16449C>Y, 9C/10C/11C/12C              | 1  | 26 | 24 |
|      | 16487A>R, 230A>R, 8C/9C               | 1  | 27 | 25 |
|      | 16507C>Y, 9C/10C/11C                  | 1  | 28 | 26 |
|      | 16512T>Y, 9C/10C/11C                  | 1  | 29 | 27 |
|      | 16518G>R, 9C/10C/11C/12C              | 1  | 30 | 28 |
|      | 16520C>T, 8C/9C                       | 1  | 31 | 29 |
|      | 16533T>Y, 189A>R, 9C/10C              | 1  | 32 | 30 |
|      | 16534A>R, 9C/10C                      | 1  | 33 | 31 |
|      | 16540C>Y, 114C>Y, 9C/10C/11C          | 1  | 34 | 32 |
|      | 16544T>Y, 9C/10C                      | 1  | 35 | 33 |
|      | 16559A>R, 9C/10C/11C                  | 1  | 36 | 34 |
|      | 2A>R, 9C/10C/11C                      | 1  | 37 | 35 |
|      | 3T>Y, 9C/10C/11C/12C                  | 1  | 38 | 36 |
|      | 3T>Y, 9C/10C/11C/12C                  | 1  | 39 | 37 |
|      | 10T>Y, 16A>R, 9C/10C/11C/12C          | 1  | 40 | 38 |
|      | 12T>Y, 9C/10C/11C/12C                 | 1  | 41 | 39 |
|      | 41C>Y, 431C>Y, 9C/10C/11C/12C         | 1  | 42 | 40 |
|      | 55T>Y, 9C/10C/11C/12C                 | 1  | 43 | 41 |
|      | 88T>Y, 9C/10C/11C                     | 1  | 44 | 42 |
|      | 91C>Y, 305C>Y, 9C/10C/11C/12C         | 1  | 45 | 43 |
|      | 97G>G/T, 8C/9C/10C                    | 1  | 46 | 44 |
|      | 98C>Y, 9C/10C/11C                     | 1  | 47 | 45 |



|      |                                        |    |    |    |
|------|----------------------------------------|----|----|----|
|      | 102A>R, 9C/10C                         | 1  | 48 | 46 |
|      | 143G>R, 9C/10C/11C/12C                 | 1  | 49 | 47 |
|      | 146T>Y, 9C/10C                         | 1  | 50 | 48 |
|      | 162C>Y, 9C/10C/11C/12C                 | 1  | 51 | 49 |
|      | 172T>Y, 9C/10C                         | 1  | 52 | 50 |
|      | 216T>Y, 9C/10C                         | 1  | 53 | 51 |
|      | 227A>R, 9C/10C/11C/12C                 | 1  | 54 | 52 |
|      | 239T>Y, 9C/10C/11C                     | 1  | 55 | 53 |
|      | 240A>R, 9C/10C/11C                     | 1  | 56 | 54 |
|      | 258C>Y, 9C/10C                         | 1  | 57 | 55 |
|      | 265T>Y, 9C/10C                         | 1  | 58 | 56 |
|      | 269C>Y, 8C/9C/10C/11C                  | 1  | 59 | 57 |
|      | 270A>R, 9C/10C/11C/12C                 | 1  | 60 | 58 |
|      | 276A>R, 10C/11C/12C                    | 1  | 61 | 59 |
|      | 278A>R, 439A>R, 9C/10C/11C/12C         | 1  | 62 | 60 |
|      | 279T>Y, 8C/9C/10C/11C                  | 1  | 63 | 61 |
|      | 308C>Y, 9C/10C                         | 1  | 64 | 62 |
|      | 309C>Y, 9C/10C/11C/12C                 | 1  | 65 | 63 |
|      | 399T>Y, 9C/10C                         | 1  | 66 | 64 |
|      | 405T>Y, 8C/9C/10C/11C/12C              | 1  | 67 | 65 |
|      | 421T>Y, 506C>Y, 9C/10C/11C/12C         | 1  | 68 | 66 |
|      | 438C>Y, 10C/11C/12C                    | 1  | 69 | 67 |
|      | 454T>Y, 9C/10C                         | 1  | 70 | 68 |
|      | 466T>Y, 9C/10C/11C                     | 1  | 71 | 69 |
|      | 552C>Y, 9C/10C/11C                     | 1  | 72 | 70 |
|      | 8C/9C                                  | 7  | 73 |    |
|      | 8C/9C/10C                              | 5  | 74 |    |
|      | 9C/10C                                 | 22 | 75 |    |
|      | 9C/10C/11C/12C                         | 25 | 76 |    |
|      | 10C/11C/12C                            | 2  | 77 |    |
| B-14 | Aggregate sequence (8C/9C/10C)         | 13 | 1  |    |
|      | 16034G>R, 9C/10C                       | 1  | 2  | 1  |
|      | 16096G>R, 9C/10C/11C/12C               | 1  | 3  | 2  |
|      | 16102T>Y, 9C/10C                       | 1  | 4  | 3  |
|      | 16109A>A/T, 146T>C, 8C/9C              | 1  | 5  | 4  |
|      | 16121T>Y, 9C/10C                       | 1  | 6  | 5  |
|      | 16150C>Y, 16377C>Y, 8C/9C              | 1  | 7  | 6  |
|      | 16169C>T, 16184C>Y, 416T>Y, 9C/10C/11C | 1  | 8  | 7  |
|      | 16229T>Y, 9C/10C                       | 1  | 9  | 8  |
|      | 16267C>Y, 113C>Y, 9C/10C/11C/12C       | 1  | 10 | 9  |
|      | 16275A>R, 8C/9C/10C/11C                | 1  | 11 | 10 |
|      | 16290C>Y, 8C/9C                        | 1  | 12 | 11 |
|      | 16312A>R, 9C/10C/11C/12C               | 1  | 13 | 12 |
|      | 16418T>Y, 9C/10C/11C/12C               | 1  | 14 | 13 |
|      | 16457G>R, 8C/9C                        | 1  | 15 | 14 |
|      | 16481A>A/T, 386C>Y, 9C/10C             | 1  | 16 | 15 |
|      | 16486A>R, 9C/10C                       | 1  | 17 | 16 |
|      | 16531A>R, 223T>Y, 9C/10C               | 1  | 18 | 17 |
|      | 16544T>Y, 9C/10C/11C                   | 1  | 19 | 18 |
|      | 12T>Y, 9C/10C                          | 1  | 20 | 19 |
|      | 15C>T, 9C/10C                          | 1  | 21 | 20 |
|      | 136G>R, 9C/10C                         | 1  | 22 | 21 |
|      | 146T>C, 8C/9C                          | 1  | 23 | 22 |
|      | 146T>Y, 497C>Y, 9C/10C/11C             | 1  | 24 | 23 |
|      | 146T>Y, 8C/9C                          | 1  | 25 | 24 |
|      | 146T>Y, 8C/9C/10C                      | 1  | 26 |    |
|      | 146T>Y, 9C/10C                         | 1  | 27 |    |
|      | 173T>Y, 9C/10C                         | 1  | 28 | 25 |

|                                         |    |    |    |
|-----------------------------------------|----|----|----|
| 200A>R, 8C/9C                           | 1  | 29 | 26 |
| 204T>C, 9C/10C/11C/12C                  | 1  | 30 | 27 |
| 204T>Y, 8C/9C                           | 1  | 31 | 28 |
| 204T>Y, 9C/10C/11C                      | 1  | 32 |    |
| 252T>Y, 8C/9C                           | 1  | 33 | 29 |
| 295C>Y, 606A>R, 9C/10C                  | 1  | 34 | 30 |
| 297A>R, 8C/9C/10C                       | 1  | 35 | 31 |
| 302A>R, 8C/9C/10C                       | 1  | 36 | 32 |
| 302delA, 303C>C/A, 9C/10C/11C           | 1  | 37 | 33 |
| 302delA, 304C>Y, 405T>Y, 9C/10C/11C/12C | 1  | 38 | 34 |
| 302delA, 9C/10C                         | 1  | 39 |    |
| 369C>Y, 9C/10C/11C/12C                  | 1  | 40 | 35 |
| 431C>Y, 8C/9C                           | 1  | 41 | 36 |
| 440delA/non-del, 9C/10C/11C             | 1  | 42 |    |
| 453T>Y, 8C/9C                           | 1  | 43 | 37 |
| 523-524delAC/non-del, 9C/10C/11C        | 1  | 44 |    |
| 534C>Y, 8C/9C/10C/11C                   | 1  | 45 | 38 |
| 573insC/non-ins, 9C/10C                 | 1  | 46 |    |
| 587C>Y, 9C/10C                          | 1  | 47 | 39 |
| 606A>R, 8C/9C                           | 1  | 48 | 40 |
| 8C/9C                                   | 8  | 49 |    |
| 8C/9C/10C/11C                           | 3  | 50 |    |
| 8C/9C/11C                               | 1  | 51 |    |
| 9C/10C                                  | 11 | 52 |    |
| 9C/10C/11C                              | 10 | 53 |    |
| 9C/10C/11C/12C                          | 3  | 54 |    |
| B-15 Aggregate sequence (9C/10C/11C)    | 20 | 1  |    |
| 16038insA/non-ins, 9C/10C/11C           | 1  | 2  |    |
| 16049G>R, 16114C>Y, 9C/10C              | 1  | 3  | 1  |
| 16053C>Y, 8C/9C/10C                     | 1  | 4  | 2  |
| 16062A>R, 16347T>Y, 9C/10C              | 1  | 5  | 3  |
| 16068T>Y, 16218C>T, 416T>Y, 8C/9C       | 1  | 6  | 4  |
| 16084G>R, 146T>Y, 8C/9C                 | 1  | 7  | 5  |
| 16109A>A/T, 8C/9C/10C                   | 1  | 8  | 6  |
| 16144T>Y, 8C/9C/10C                     | 1  | 9  | 7  |
| 16151C>Y, 9C/10C                        | 1  | 10 | 8  |
| 16162A>G, 9C/10C/11C                    | 1  | 11 | 9  |
| 16179C>Y, 9C/10C/11C/12C                | 1  | 12 | 10 |
| 16237A>R, 8C/9C/10C                     | 1  | 13 | 11 |
| 16249T>Y, 9C/10C                        | 1  | 14 | 12 |
| 16268C>Y, 423T>Y, 9C/10C/11C/12C        | 1  | 15 | 13 |
| 16274G>R, 353C>Y, 9C/10C                | 1  | 16 | 14 |
| 16379C>Y, 9C/10C                        | 1  | 17 | 15 |
| 16395C>Y, 9C/10C/11C                    | 1  | 18 | 16 |
| 16403C>Y, 9C/10C/11C                    | 1  | 19 | 17 |
| 16453C>Y, 8C/9C/10C/11C                 | 1  | 20 | 18 |
| 16506T>Y, 59T>Y, 9C/10C/11C/12C         | 1  | 21 | 19 |
| 16529T>Y, 8C/9C                         | 1  | 22 | 20 |
| 13A>R, 9C/10C/11C/12C                   | 1  | 23 | 21 |
| 33C>Y, 9C/10C                           | 1  | 24 | 22 |
| 54G>R, 8C/9C/10C                        | 1  | 25 | 23 |
| 68G>R, 9C/10C/11C/12C                   | 1  | 26 | 24 |
| 74T>Y, 9C/10C/11C                       | 1  | 27 | 25 |
| 121G>R, 146T>C, 9C/10C/11C/12C          | 1  | 28 | 26 |
| 125T>Y, 9C/10C                          | 1  | 29 | 27 |
| 199T>Y, 490A>R, 9C/10C/11C              | 1  | 30 | 28 |
| 227A>A/T, 384A>R, 9C/10C/11C/12C        | 1  | 31 | 29 |
| 245T>Y, 9C/10C                          | 1  | 32 | 30 |

|                 |                                      |    |    |    |
|-----------------|--------------------------------------|----|----|----|
|                 | 285C>Y, 8C/9C/10C/11C                | 1  | 33 | 31 |
|                 | 298C>Y, 9C/10C/11C                   | 1  | 34 | 32 |
|                 | 302delA, 9C/10C                      | 1  | 35 |    |
|                 | 356C>Y, 8C/9C                        | 1  | 36 | 33 |
|                 | 382C>Y, 8C/9C                        | 1  | 37 | 34 |
|                 | 422T>Y, 9C/10C/11C                   | 1  | 38 | 35 |
|                 | 435C>Y, 8C/9C                        | 1  | 39 | 36 |
|                 | 442T>Y, 607C>Y, 9C/10C/11C/12C       | 1  | 40 | 37 |
|                 | 454T>Y, 8C/9C/10C                    | 1  | 41 | 38 |
|                 | 482T>Y, 8C/9C                        | 1  | 42 | 39 |
|                 | 605T>Y, 9C/10C                       | 1  | 43 | 40 |
|                 | 605T>Y, 8C/9C/10C                    | 1  | 44 |    |
|                 | 626G>R, 8C/9C/10C                    | 1  | 45 | 41 |
|                 | 8C/9C                                | 4  | 46 |    |
|                 | 8C/9C/10C                            | 3  | 47 |    |
|                 | 8C/9C/10C/11C                        | 2  | 48 |    |
|                 | 9C/10C                               | 18 | 49 |    |
|                 | 9C/10C/11C/12C                       | 5  | 50 |    |
| B-16            | Aggregate sequence (9C/10C/11C)      | 25 | 1  |    |
|                 | 16095C>C/G, 9C/10C/11C               | 1  | 2  | 1  |
|                 | 16095C>Y, 9C/10C/11C                 | 1  | 3  | 2  |
|                 | 16158A>R, 9C/10C/11C/12C             | 1  | 4  | 3  |
|                 | 16167C>Y, 16185C>Y, 9C/10C           | 1  | 5  | 4  |
|                 | 16173C>Y, 9C/10C                     | 1  | 6  | 5  |
|                 | 16176C>Y, 9C/10C/11C/12C             | 1  | 7  | 6  |
|                 | 16177A>A/T, 8C/9C                    | 1  | 8  | 7  |
|                 | 16180A>R, 9C/10C/11C                 | 1  | 9  | 8  |
|                 | 16260C>Y, 8C/9C                      | 1  | 10 | 9  |
|                 | 16286C>Y, 9C/10C/11C/12C             | 1  | 11 | 10 |
|                 | 16291C>Y, 9C/10C                     | 1  | 12 | 11 |
|                 | 16384G>R, 9C/10C                     | 1  | 13 | 12 |
|                 | 16478C>Y, 9C/10C/11C                 | 1  | 14 | 13 |
|                 | 151C>T, 9C/10C/11C/12                | 1  | 15 | 14 |
|                 | 167C>Y, 9C/10C                       | 1  | 16 | 15 |
|                 | 179T>Y, 9C/10C/11C                   | 1  | 17 | 16 |
|                 | 204T>Y, 8C/9C                        | 1  | 18 | 17 |
|                 | 252T>Y, 9C/10C/11C                   | 1  | 19 | 18 |
|                 | 296C>Y, 9C/10C/11C                   | 1  | 20 | 19 |
|                 | 303C>Y, 9C/10C/11C/12C               | 1  | 21 | 20 |
|                 | 398T>Y, 9C/10C/11C                   | 1  | 22 | 21 |
|                 | 467C>Y, 9C/10C                       | 1  | 23 | 22 |
|                 | 569C>Y, 9C/10C                       | 1  | 24 | 23 |
|                 | 523-524delAC/non-del, 9C/10C/11C/12C | 1  | 25 |    |
|                 | 8C                                   | 1  | 26 |    |
|                 | 8C/9C                                | 3  | 27 |    |
|                 | 8C/9C/10C                            | 3  | 28 |    |
|                 | 8C/9C/10C/11C                        | 1  | 29 |    |
|                 | 9C/10C                               | 18 | 30 |    |
|                 | 9C/10C/11C/12C                       | 21 | 31 |    |
| <b>Family C</b> |                                      |    |    |    |
| C-1             | aggregate sequence                   | 32 | 1  |    |
|                 | 16032T>Y                             | 1  | 2  | 1  |
|                 | 16055C>Y, 16541A>R                   | 1  | 3  | 2  |
|                 | 16129G>A, 16471G>A                   | 1  | 4  | 3  |
|                 | 16131T>C                             | 1  | 5  | 4  |
|                 | 16131T>C, 452T>Y                     | 1  | 6  | 5  |
|                 | 16137A>R, 305C>Y, 7C/8C              | 1  | 7  | 6  |

|                              |    |    |    |
|------------------------------|----|----|----|
| 16140T>Y, 162C>C/A, 519A>A/T | 1  | 8  | 7  |
| 16149A>A/T, 152T>C           | 1  | 9  | 8  |
| 16171A>A/T, 204T>C           | 1  | 10 | 9  |
| 16189T>Y, 16252A>R           | 1  | 11 | 10 |
| 16189T>Y, 16559A>R           | 1  | 12 | 11 |
| 16210A>R                     | 1  | 13 | 12 |
| 16277A>R                     | 1  | 14 | 13 |
| 16292delC/non-del            | 1  | 15 |    |
| 16297T>Y                     | 1  | 16 | 14 |
| 16319G>A                     | 1  | 17 | 15 |
| 16323T>Y                     | 1  | 18 | 16 |
| 16346G>R, 278A>R, 8C/9C      | 1  | 19 | 17 |
| 16353C>Y, 8C/9C              | 1  | 20 | 18 |
| 16409T>Y, 385A>G             | 1  | 21 | 19 |
| 16411C>Y                     | 1  | 22 | 20 |
| 16413T>T/G, 204T>C           | 1  | 23 | 21 |
| 16448T>Y, 109G>R, 8C/9C      | 1  | 24 | 22 |
| 16463A>R                     | 1  | 25 | 23 |
| 16474insG/non-ins            | 1  | 26 |    |
| 16521A>R                     | 1  | 27 | 24 |
| 16538C>Y                     | 1  | 28 | 25 |
| 13A>R                        | 1  | 29 | 26 |
| 37A>R                        | 1  | 30 | 27 |
| 53G>G/T                      | 1  | 31 | 28 |
| 55T>Y                        | 1  | 32 | 29 |
| 113C>Y, 8C/9C                | 1  | 33 | 30 |
| 126A>A/T, 394C>Y, 471T>Y     | 1  | 34 | 31 |
| 153A>G                       | 1  | 35 | 32 |
| 204T>C                       | 2  | 36 | 33 |
| 204T>Y, 291delA              | 1  | 37 | 34 |
| 234A>R                       | 1  | 38 | 35 |
| 312C>Y                       | 1  | 39 | 36 |
| 398T>Y                       | 1  | 40 | 37 |
| 438delC/non-del              | 1  | 41 |    |
| 453T>Y                       | 1  | 42 | 38 |
| 478A>R                       | 1  | 43 | 39 |
| 490A>R                       | 1  | 44 | 40 |
| 512A>A/C, 7C/8C              | 1  | 45 | 41 |
| 512A>R                       | 1  | 46 | 42 |
| 532A>R                       | 1  | 47 | 43 |
| 541C>Y                       | 1  | 48 | 44 |
| 558C>Y                       | 1  | 49 | 45 |
| 7C/8C                        | 2  | 50 |    |
| 8C/9C                        | 10 | 51 |    |

|     |                                        |    |    |    |
|-----|----------------------------------------|----|----|----|
| C-2 | Aggregate sequence                     | 29 | 1  |    |
|     | 16075T>Y                               | 1  | 2  | 1  |
|     | 16092T>Y                               | 1  | 3  | 2  |
|     | 16129G>A                               | 1  | 4  | 3  |
|     | 16151C>Y, 16324T>T/A                   | 1  | 5  | 4  |
|     | 16166A>C                               | 1  | 6  | 5  |
|     | 16213G>A, 5A>R, 71delG                 | 1  | 7  | 6  |
|     | 16219A>R                               | 1  | 8  | 7  |
|     | 16221C>Y                               | 1  | 9  | 8  |
|     | 16251C>Y                               | 1  | 10 | 9  |
|     | 16291C>Y, 16435A>R, 462C>Y             | 1  | 11 | 10 |
|     | 16302A>R, 617G>R                       | 1  | 12 | 11 |
|     | 16311T>Y, 71delG, 523-524delAC/non-del | 1  | 13 | 12 |
|     | 16333A>R                               | 1  | 14 | 13 |

|     |                                |    |    |    |
|-----|--------------------------------|----|----|----|
|     | 16365C>Y, 71delG               | 1  | 15 | 14 |
|     | 16369G>A, 146T>C               | 1  | 16 | 15 |
|     | 16377C>T, 71delG               | 1  | 17 | 16 |
|     | 16406T>Y                       | 1  | 18 | 17 |
|     | 16425C>Y                       | 1  | 19 | 18 |
|     | 16439C>Y                       | 1  | 20 | 19 |
|     | 16476A>R, 72T>Y                | 1  | 21 | 20 |
|     | 16479T>Y                       | 1  | 22 | 21 |
|     | 16489T>Y, 71delG               | 1  | 23 | 22 |
|     | 16540C>T                       | 1  | 24 | 23 |
|     | 16563C>Y                       | 1  | 25 | 24 |
|     | 59T>T/G, 71delG                | 1  | 26 | 25 |
|     | 71delG                         | 15 | 27 |    |
|     | 71delG, (311-315)6C/7C         | 1  | 28 |    |
|     | 71delG, 131T>Y, 497C>Y         | 1  | 29 | 26 |
|     | 71delG, 220T>Y                 | 1  | 30 | 27 |
|     | 71delG, 452T>Y                 | 1  | 31 | 28 |
|     | 71delG, 8C/9C                  | 1  | 32 |    |
|     | 71delG/non-del                 | 2  | 33 |    |
|     | 72T>Y, 193A>R                  | 1  | 34 | 29 |
|     | 113C>Y                         | 1  | 35 | 30 |
|     | 206T>Y                         | 1  | 36 | 31 |
|     | 242C>Y                         | 1  | 37 | 32 |
|     | 247G>A                         | 1  | 38 | 33 |
|     | 373A>T, 8C/9C                  | 1  | 39 | 34 |
|     | 393T>Y, 414T>G, 7C/8C          | 1  | 40 | 35 |
|     | 612A>R, 8C/9C                  | 1  | 41 | 36 |
|     | 627G>R                         | 1  | 42 | 37 |
|     | 523-524delAC/non-del           | 2  | 43 |    |
|     | 7C/8C/9C                       | 3  | 44 |    |
|     | 8C/9C                          | 4  | 45 |    |
| C-3 | aggregate sequence             | 77 | 1  |    |
|     | 16129G>R                       | 1  | 2  | 1  |
|     | 16221C>Y                       | 1  | 3  | 2  |
|     | 16265A>C                       | 1  | 4  | 3  |
|     | 16266C>Y                       | 1  | 5  | 4  |
|     | 16287C>Y                       | 1  | 6  | 5  |
|     | 16304T (same as CRS)           | 1  | 7  | 6  |
|     | 146T>Y                         | 1  | 8  | 7  |
|     | 150C>T, 7C/8C                  | 1  | 9  | 8  |
|     | 152T>Y                         | 2  | 10 | 9  |
|     | 189A>R                         | 2  | 11 | 10 |
|     | 215A>R                         | 1  | 12 | 11 |
|     | 222C>Y                         | 1  | 13 | 12 |
|     | 491C>Y                         | 1  | 14 | 13 |
|     | 522C>Y                         | 1  | 15 | 14 |
|     | 593T>Y                         | 1  | 16 | 15 |
|     | 523-524delAC/non-del           | 2  | 17 |    |
| C-4 | aggregate sequence             | 40 | 1  |    |
|     | 16023G>R                       | 1  | 2  | 1  |
|     | 16053C>Y, 523-524delAC/non-del | 1  | 3  | 2  |
|     | 16062A>R                       | 1  | 4  | 3  |
|     | 16083C>Y, 172T>Y               | 1  | 5  | 4  |
|     | 16086T>Y                       | 1  | 6  | 5  |
|     | 16126T>Y                       | 1  | 7  | 6  |
|     | 16129G>R, 8C/9C/10C            | 1  | 8  | 7  |
|     | 16132A>R, 8C/9C                | 1  | 9  | 8  |

|     |                                     |    |    |    |
|-----|-------------------------------------|----|----|----|
|     | 16148C>Y                            | 1  | 10 | 9  |
|     | 16151C>Y                            | 1  | 11 | 10 |
|     | 16183A>R                            | 1  | 12 | 11 |
|     | 16189T>Y                            | 1  | 13 | 12 |
|     | 16192C>Y, 529G>R                    | 1  | 14 | 13 |
|     | 16214C>Y                            | 1  | 15 | 14 |
|     | 16254A>R                            | 1  | 16 | 15 |
|     | 16266C>Y                            | 1  | 17 | 16 |
|     | 16278C>Y                            | 1  | 18 | 17 |
|     | 16327C>Y, 495C>Y                    | 1  | 19 | 18 |
|     | 16345A>R, 7C/8C                     | 1  | 20 | 19 |
|     | 16368T>C                            | 1  | 21 | 20 |
|     | 16397T>Y                            | 2  | 22 | 21 |
|     | 16457G>R, 124G>R                    | 1  | 23 | 22 |
|     | 16546C>Y, 7C/8C                     | 1  | 24 | 23 |
|     | 16567A>R                            | 1  | 25 | 24 |
|     | 5A>R                                | 1  | 26 | 25 |
|     | 26C>Y                               | 1  | 27 | 26 |
|     | 29C>Y                               | 1  | 28 | 27 |
|     | 31C>Y, 185G>R                       | 1  | 29 | 28 |
|     | 57T>Y                               | 1  | 30 | 29 |
|     | 71insG/non-ins                      | 1  | 31 |    |
|     | 103G>R                              | 1  | 32 | 30 |
|     | 152T>Y                              | 1  | 33 | 31 |
|     | 153A>R, 542C>Y, 7C/8C, 523-524delAC | 1  | 34 | 32 |
|     | 204T>C                              | 1  | 35 | 33 |
|     | 234A>R                              | 1  | 36 | 34 |
|     | 354C>Y                              | 1  | 37 | 35 |
|     | 367A>R                              | 1  | 38 | 36 |
|     | 427C>Y, 8C/9C                       | 1  | 39 | 37 |
|     | 437C>Y                              | 1  | 40 | 38 |
|     | 471T>Y                              | 1  | 41 | 39 |
|     | 503A>R                              | 1  | 42 | 40 |
|     | 549C>Y                              | 1  | 43 | 41 |
|     | 567A>R, 8C/9C                       | 1  | 44 | 42 |
|     | 593T>Y                              | 1  | 45 | 43 |
|     | 7C/8C                               | 5  | 46 |    |
|     | 8C/9C                               | 5  | 47 |    |
|     | 523-524delAC/non-del                | 1  | 48 |    |
| C-5 | aggregate sequence                  | 99 | 1  |    |
|     | 16086T>Y                            | 1  | 2  | 1  |
|     | 16129G>R                            | 1  | 3  | 2  |
|     | 16289A>R                            | 1  | 4  | 3  |
|     | 16399A>R                            | 1  | 5  | 4  |
|     | 16407C>Y                            | 1  | 6  | 5  |
|     | 16497A>R                            | 1  | 7  | 6  |
|     | 16519T                              | 1  | 8  | 7  |
|     | 182C>Y                              | 1  | 9  | 8  |
|     | 204T>C                              | 1  | 10 | 9  |
|     | 204T>Y                              | 1  | 11 | 10 |
|     | 251G>A                              | 1  | 12 | 11 |
|     | 385A>G                              | 1  | 13 | 12 |
|     | 513G>R                              | 1  | 14 | 13 |
| C-6 | aggregate sequence                  | 88 | 1  |    |
|     | 16380insC/non-ins                   | 1  | 2  |    |
|     | 36delG/non-del                      | 1  | 3  |    |
|     | 116A>R                              | 1  | 4  | 1  |

|                 |                            |    |    |    |
|-----------------|----------------------------|----|----|----|
|                 | 178A>R                     | 1  | 5  | 2  |
|                 | 189A>R                     | 1  | 6  | 3  |
|                 | 204T>C                     | 1  | 7  | 4  |
|                 | 524C>Y                     | 1  | 8  | 5  |
| C-7             | aggregate sequence         | 53 | 1  |    |
|                 | 16032T>Y, 460T>Y           | 1  | 2  | 1  |
|                 | 16103A>R                   | 1  | 3  | 2  |
|                 | 16131T>Y, 16442C>Y         | 1  | 4  | 3  |
|                 | 16149A>G                   | 1  | 5  | 4  |
|                 | 16277A>R                   | 1  | 6  | 5  |
|                 | 16282C>Y                   | 1  | 7  | 6  |
|                 | 16291C>Y, 8C/9C            | 1  | 8  | 7  |
|                 | 16362T>Y                   | 1  | 9  | 8  |
|                 | 16363C>Y                   | 1  | 10 | 9  |
|                 | 16367A>R, 564G>R           | 1  | 11 | 10 |
|                 | 16368T>T/G, 146T>Y         | 1  | 12 | 11 |
|                 | 16462T>T/A, 227A>R         | 1  | 13 | 12 |
|                 | 16502T>Y                   | 1  | 14 | 13 |
|                 | 16517G>R                   | 2  | 15 | 14 |
|                 | 16538C>Y, 8C/9C            | 1  | 16 | 15 |
|                 | 71delG/non-del             | 1  | 17 |    |
|                 | 173T>Y                     | 1  | 18 | 16 |
|                 | 258C>Y                     | 1  | 19 | 17 |
|                 | 303C>Y                     | 1  | 20 | 18 |
|                 | 340C>Y                     | 1  | 21 | 19 |
|                 | 408T>Y                     | 1  | 22 | 20 |
|                 | 443A>R                     | 1  | 23 | 21 |
|                 | 497C>Y                     | 1  | 24 | 22 |
|                 | 517A>R                     | 1  | 25 | 23 |
|                 | 572C>Y                     | 1  | 26 | 24 |
|                 | 8C/9C, 573delC/non-del     | 1  | 27 |    |
|                 | 7C/8C                      | 4  | 28 |    |
|                 | 8C/9C                      | 10 | 29 |    |
| C-8             | aggregate sequence         | 75 | 1  |    |
|                 | 16122A>R, 228G>R           | 1  | 2  | 1  |
|                 | 16129G>R                   | 1  | 3  | 2  |
|                 | 16135A>R                   | 1  | 4  | 3  |
|                 | 16139A>R                   | 1  | 5  | 4  |
|                 | 16159C>Y                   | 1  | 6  | 5  |
|                 | 16395C>Y                   | 1  | 7  | 6  |
|                 | 16399A>R                   | 1  | 8  | 7  |
|                 | 16399A>R, 16405A>R, 142T>Y | 1  | 9  | 8  |
|                 | 16399A>R, 16488C>Y         | 1  | 10 | 9  |
|                 | 16417A>R, 16433A>R         | 1  | 11 | 10 |
|                 | 16440T>Y                   | 1  | 12 | 11 |
|                 | 445C>Y                     | 1  | 13 | 12 |
|                 | 469C>Y                     | 1  | 14 | 13 |
|                 | 570C>Y                     | 1  | 15 | 14 |
|                 | 8C/9C                      | 3  | 16 |    |
| <b>Family D</b> |                            |    |    |    |
| D-1             | aggregate sequence         | 57 | 1  |    |
|                 | 16036delG/non-del, 180T>Y  | 1  | 2  | 1  |
|                 | 16099C>Y, 15C>Y            | 1  | 3  | 2  |
|                 | 16106G>R                   | 1  | 4  | 3  |
|                 | 16119A>R                   | 1  | 5  | 4  |
|                 | 16122A>R                   | 2  | 6  | 5  |

|                   |                                  |    |    |    |
|-------------------|----------------------------------|----|----|----|
|                   | 16129G>R                         | 1  | 7  | 6  |
|                   | 16130G>R                         | 1  | 8  | 7  |
|                   | 16132A>R, 16465C>Y               | 1  | 9  | 8  |
|                   | 16189T>Y                         | 1  | 10 | 9  |
|                   | 16190C>Y, 7C/8C                  | 1  | 11 | 10 |
|                   | 16192C>Y, 16477G>R, 59T>Y, 7C/8C | 1  | 12 | 11 |
|                   | 16272A>R, 533A>R                 | 1  | 13 | 12 |
|                   | 16335A>R                         | 1  | 14 | 13 |
|                   | 16352T>Y, 438C>Y                 | 1  | 15 | 14 |
|                   | 16428G (same to CRS)             | 2  | 16 | 15 |
|                   | 16439C>Y                         | 1  | 17 | 16 |
|                   | 16515A>R                         | 1  | 18 | 17 |
|                   | 109G>R, 526G>R, 533A>A/T         | 1  | 19 | 18 |
|                   | 142T>Y                           | 1  | 20 | 19 |
|                   | 146T>Y, 456C>Y                   | 1  | 21 | 20 |
|                   | 234A>R, 6C/7C                    | 1  | 22 | 21 |
|                   | 242C>Y                           | 1  | 23 | 22 |
|                   | 244A>R                           | 1  | 24 | 23 |
|                   | 253C>Y, 356C>Y                   | 1  | 25 | 24 |
|                   | 262C>Y                           | 1  | 26 | 25 |
|                   | 260G>A                           | 1  | 27 | 26 |
|                   | 399T>Y, 506C>Y                   | 1  | 28 | 27 |
|                   | 490A>R                           | 1  | 29 | 28 |
|                   | 517A>R                           | 1  | 30 | 29 |
|                   | 540A>G                           | 1  | 31 | 30 |
|                   | 540A>R                           | 1  | 32 | 31 |
|                   | 561A>A/T                         | 1  | 33 | 32 |
|                   | 573delC/non-del                  | 2  | 34 |    |
|                   | 523-524delAC/non-del             | 1  | 35 |    |
|                   | 6C/7C                            | 1  | 36 |    |
|                   | 7C/8C                            | 1  | 37 |    |
| D-2               | aggregate sequence               | 76 | 1  |    |
|                   | 16051A>R, 16430A>A/T, 227A>R     | 1  | 2  | 1  |
|                   | 16068T>Y, 40T>Y                  | 1  | 3  | 2  |
|                   | 16162A>R                         | 1  | 4  | 3  |
|                   | 16168C>Y, 16335A>R               | 1  | 5  | 4  |
|                   | 16172T>Y                         | 1  | 6  | 5  |
|                   | 16192C>Y, 16435A>R               | 1  | 7  | 6  |
|                   | 16397T>Y, 16547C>Y               | 1  | 8  | 7  |
|                   | 16399A>R                         | 1  | 9  | 8  |
|                   | 16404C>Y                         | 1  | 10 | 9  |
|                   | 16408C>Y                         | 1  | 11 | 10 |
|                   | 47G>R                            | 1  | 12 | 11 |
|                   | 91C>Y                            | 1  | 13 | 12 |
|                   | 195T>Y                           | 1  | 14 | 13 |
|                   | 204T>C                           | 1  | 15 | 14 |
|                   | 204T>Y                           | 1  | 16 | 15 |
|                   | 419A>R                           | 1  | 17 | 16 |
|                   | 439A>R                           | 1  | 18 | 17 |
|                   | 490A>R                           | 1  | 19 | 18 |
|                   | 515A>A/T                         | 1  | 20 | 19 |
|                   | 523-524delAC/non-del             | 1  | 21 | 20 |
| <b>Cord blood</b> |                                  |    |    |    |
| CB-1              | aggregate sequence               | 86 | 1  |    |
|                   | 16134C>Y                         | 1  | 2  | 1  |
|                   | 16201C>Y                         | 1  | 3  | 2  |



|      |                              |     |    |    |
|------|------------------------------|-----|----|----|
|      | 194C>Y                       | 1   | 4  | 3  |
|      | 247G>R                       | 1   | 5  | 4  |
|      | 7C/8C                        | 3   | 6  |    |
| CB-2 | aggregate sequence (8C/9C)   | 102 | 1  |    |
|      | 16022T>Y, 8C/9C              | 1   | 2  | 1  |
|      | 16038delA/non-del, 8C/9C/10C | 1   | 3  |    |
|      | 16100A>R, 8C/9C              | 1   | 4  | 2  |
|      | 16102T>Y, 265T>Y, 8C/9C      | 1   | 5  | 3  |
|      | 16111C>Y, 8C/9C              | 1   | 6  | 4  |
|      | 16179C>Y, 8C/9C              | 1   | 7  | 5  |
|      | 16215A>R, 16431C>Y, 8C/9C    | 1   | 8  | 6  |
|      | 16301C>Y, 8C/9C/10C          | 1   | 9  | 7  |
|      | 16432A>R, 8C/9C              | 1   | 10 | 8  |
|      | 16519T>Y, 8C/9C              | 1   | 11 | 9  |
|      | 85G>A, 200A>R, 8C/9C         | 1   | 12 | 10 |
|      | 86C>Y, 8C/9C                 | 1   | 13 | 11 |
|      | 131T>Y, 8C/9C                | 1   | 14 | 12 |
|      | 143G>R, 8C/9C                | 1   | 15 | 13 |
|      | 152T>T/A, 8C/9C              | 1   | 16 | 14 |
|      | 166C>Y, 8C/9C/10C            | 1   | 17 | 15 |
|      | 178A>R, 8C/9C                | 5   | 18 | 16 |
|      | 178A>R, 8C/9C/10C            | 2   | 19 |    |
|      | 193A>R, 8C/9C                | 1   | 20 | 17 |
|      | 308C>Y, 8C/9C/10C            | 1   | 21 | 18 |
|      | 416T>Y, 8C/9C                | 1   | 22 | 19 |
|      | 467C>Y, 8C/9C/10C            | 1   | 23 | 20 |
|      | 494C>Y, 8C/9C                | 1   | 24 | 21 |
|      | 498delC/non-del, 8C/9C       | 1   | 25 |    |
|      | 559C>Y, 8C/9C                | 1   | 26 | 22 |
|      | 573delC/non-del, 8C/9C       | 1   | 27 |    |
|      | 609C>Y, 8C/9C                | 1   | 28 | 23 |
|      | 8C/9C, 523-524delAC/non-del  | 1   | 29 |    |
|      | 8C/9C/10C                    | 52  | 30 |    |
| CB-3 | aggregate sequence           | 46  | 1  |    |
|      | 16274G>R                     | 1   | 2  | 1  |
|      | 16278C>Y, 8C/9C              | 1   | 3  | 2  |
|      | 16343A>R, 16470G>R           | 1   | 4  | 3  |
|      | 16540C>Y, 8C/9C              | 1   | 5  | 4  |
|      | 16545T>Y, 8C/9C              | 1   | 6  | 5  |
|      | 5A>R                         | 1   | 7  | 6  |
|      | 24A>R, 8C/9C                 | 1   | 8  | 7  |
|      | 27C>Y                        | 2   | 9  | 8  |
|      | 44C>Y, 8C/9C                 | 1   | 10 | 9  |
|      | 72T>Y                        | 1   | 11 | 10 |
|      | 116A>A/T, 229G>R             | 1   | 12 | 11 |
|      | 222C>Y                       | 1   | 13 | 12 |
|      | 516C>Y                       | 1   | 14 | 13 |
|      | 572C>Y                       | 1   | 15 | 14 |
|      | 587C>Y                       | 1   | 16 | 15 |
|      | 8C/9C                        | 29  | 17 |    |
|      | 8C/9C/10C                    | 4   | 18 |    |

---

Note: For each donor, mutation in each single cell was scored relative to the aggregate sequence of all single cells, and mutation was numbered according to the revised Cambridge reference sequence. A site heterogeneous for both thymidine (T) and cytidine (C) was abbreviated as Y, and heterogeneous for adenosine (A) and guanosine (G) was abbreviated as R. A site heterogeneous for a transversion was highlighted by listing all status, e.g. 515A>A/T means site 515 has both A and T. We highlight the status of the length mutations of the C-tract at region 303-309 and the dinucleotide AC repeat at region 515-524 in these cells differ from the aggregate sequence by listing all the status, e.g. 8C means region 303-315 has CCCCCCCTCCCCC in the cell, 8C/9C means region 303-315 has a heteroplasmy of CCCCCCCTCCCCC and CCCCCCCTCCCCC in the cell, 523-524delAC means this cell contains 4 repeats of AC at region 515-524, while 523-524insAC/non-ins means co-existence of 6 and 5 repeats of AC at region 515-524 in the cell. Back mutations relative to the sequence variation in aggregate sequence are denoted by adding "(same to CRS)" .
